# Supplementary material for: Morpho-physiological traits and yield quality for cassava genotypes planted under drought during canopy establishment
Source: PeerJ journal article supplement (doi:10.7717/peerj.20440), 2025-12-05
Supplement: Supplementary_Data.xlsx [file Supplementary_Data.xlsx]

## Sheet: RWC_Year 1
3 Months after planting											4 Months after planting							5 Months after planting							6 Months after planting							12 Months after planting
Plot No.	Rep	Main P	Sub P	Water	Var	fresh weight	turgid weight	dry weight	Relative water content		Plot No.	Var	fresh weight	turgid weight	dry weight	Relative water content		Plot No.	Var	fresh weight	turgid weight	dry weight	Relative water content		Plot No.	Var	fresh weight	turgid weight	dry weight	Relative water content		Plot No.	Var	fresh weight	turgid weight	dry weight	Relative water content
1101	1	1	1	Rainfed	RY9	0.1693	0.1825	0.0552	89.6308		1101	RY9	0.1694	0.1951	0.0569	81.4038		1101	RY9	0.2009	0.2197	0.062	88.0786		1101	RY9	0.1694	0.1923	0.0515	83.7358		1101	RY9	0.1614	0.1715	0.0490679	91.7505
1102	1	1	2	Rainfed	KU50	0.1577	0.1634	0.0515	94.9062		1102	KU50	0.1772	0.1881	0.065	91.1454		1102	KU50	0.189	0.2042	0.058	89.6033		1102	KU50	0.1791	0.1935	0.0452	90.29		1102	KU50	0.1576	0.1592	0.039774	98.6603
1103	1	1	3	Rainfed	CMR38-125-77	0.1949	0.233	0.0681	76.8951		1103	CMR38-125-77	0.1609	0.1804	0.0682	82.6203		1103	CMR38-125-77	0.1559	0.167	0.064	89.2233		1103	CMR38-125-77	0.16	0.1779	0.0493	86.0809		1103	CMR38-125-77	0.1568	0.159	0.048314	98.0124
1104	1	1	5	Rainfed	CMR35-91-63	0.192	0.1984	0.0596	95.389		1104	CMR35-91-63	0.1738	0.189	0.0558	88.5886		1104	CMR35-91-63	0.2074	0.2147	0.064	95.1559		1104	CMR35-91-63	0.1726	0.1882	0.0547	88.3146		1104	CMR35-91-63	0.1634	0.1888	0.0598341	80.3049
1105	1	1	4	Rainfed	RY72	0.1582	0.1988	0.054	71.9613		1105	RY72	0.1604	0.1687	0.0509	92.9542		1105	RY72	0.1542	0.1667	0.05	89.2888		1105	RY72	0.1628	0.1782	0.052	87.7971		1105	RY72	0.162	0.1651	0.0517445	97.2652
1106	1	1	6	Rainfed	CM523-7	0.1409	0.1942	0.0461	64.0108		1106	CM523-7	0.1627	0.1779	0.052	87.9269		1106	CM523-7	0.1901	0.2056	0.06	89.3544		1106	CM523-7	0.1608	0.1664	0.0504	95.1724		1106	CM523-7	0.1507	0.1601	0.0472343	91.6715
1201	1	2	2	Irrigation	KU50	0.1652	0.1739	0.0547	92.7013		1201	KU50	0.187	0.1916	0.0589	96.5335		1201	KU50	0.1797	0.1891	0.054	93.0422		1201	KU50	0.1936	0.1978	0.0655	96.8254		1201	KU50	0.1449	0.1455	0.0490235	99.3781
1202	1	2	3	Irrigation	CMR38-125-77	0.1515	0.1624	0.0598	89.3762		1202	CMR38-125-77	0.1842	0.1931	0.0564	93.4894		1202	CMR38-125-77	0.0921	0.1004	0.061	78.934		1202	CMR38-125-77	0.1782	0.1795	0.0597	98.9149		1202	CMR38-125-77	0.1586	0.1634	0.0531337	95.6469
1203	1	2	5	Irrigation	CMR35-91-63	0.1787	0.1909	0.0529	91.1594		1203	CMR35-91-63	0.2005	0.2096	0.0641	93.7457		1203	CMR35-91-63	0.1092	0.1561	0.055	53.6103		1203	CMR35-91-63	0.1808	0.204	0.0579	84.1205		1203	CMR35-91-63	0.1694	0.1772	0.0542492	93.656
1204	1	2	1	Irrigation	RY9	0.1554	0.1654	0.0533	91.0794		1204	RY9	0.1945	0.2065	0.0587	91.8809		1204	RY9	0.1794	0.189	0.052	92.9927		1204	RY9	0.1986	0.2178	0.066	87.3518		1204	RY9	0.2017	0.2083	0.0670302	95.3281
1205	1	2	4	Irrigation	RY72	0.1495	0.1556	0.0537	94.0137		1205	RY72	0.1622	0.1688	0.0534	94.2808		1205	RY72	0.1752	0.1796	0.06	96.3211		1205	RY72	0.1664	0.1767	0.0539	91.6124		1205	RY72	0.1663	0.1735	0.0538676	93.9816
1206	1	2	6	Irrigation	CM523-7	0.1405	0.1483	0.0501	92.057		1206	CM523-7	0.1856	0.195	0.0578	93.1487		1206	CM523-7	0.1752	0.1863	0.054	91.61		1206	CM523-7	0.1806	0.1927	0.0594	90.9227		1206	CM523-7	0.1411	0.151	0.0464083	90.5346
2101	2	1	1	Rainfed	RY9	0.1752	0.1873	0.063	90.2655		2101	RY9	0.1879	0.1947	0.0614	94.8987		2101	RY9	0.1809	0.2078	0.058	82.0427		2101	RY9	0.1905	0.1932	0.0586	97.9941		2101	RY9	0.1501	0.157	0.0461725	93.7741
2102	2	1	4	Rainfed	RY72	0.0788	0.0813	0.0272	95.3789		2102	RY72	0.1764	0.1813	0.0555	96.1049		2102	RY72	0.1698	0.1855	0.052	88.2397		2102	RY72	0.1608	0.1719	0.0491	90.9609		2102	RY72	0.1634	0.171	0.0498939	93.7245
2103	2	1	3	Rainfed	CMR38-125-77	0.0835	0.088	0.0279	92.5125		2103	CMR38-125-77	0.1736	0.1905	0.056	87.4349		2103	CMR38-125-77	0.1767	0.1855	0.057	93.1518		2103	CMR38-125-77	0.1722	0.1951	0.051	84.1083		2103	CMR38-125-77	0.1432	0.1557	0.0424111	88.9663
2104	2	1	6	Rainfed	CM523-7	0.1394	0.145	0.0434	94.4882		2104	CM523-7	0.1734	0.1743	0.0557	99.2411		2104	CM523-7	0.1753	0.1971	0.055	84.6587		2104	CM523-7	0.1522	0.173	0.0477	83.3998		2104	CM523-7	0.1481	0.1599	0.046415	89.6021
2105	2	1	5	Rainfed	CMR35-91-63	0.1658	0.1731	0.0582	93.6466		2105	CMR35-91-63	0.2104	0.2179	0.0655	95.0787		2105	CMR35-91-63	0.1734	0.1863	0.057	90.0232		2105	CMR35-91-63	0.1855	0.1874	0.0554	98.5606		2105	CMR35-91-63	0.1763	0.185	0.0526524	93.4264
2106	2	1	2	Rainfed	KU50	0.1684	0.1745	0.0559	94.8567		2106	KU50	0.19	0.1996	0.0638	92.9308		2106	KU50	0.0811	0.0903	0.0557	73.4104		2106	KU50	0.1718	0.1799	0.0524	93.6471		2106	KU50	0.166	0.1731	0.050631	94.2026
2201	2	2	4	Irrigation	RY72	0.1565	0.1626	0.0534	94.4139		2201	RY72	0.1719	0.181	0.0589	92.5471		2201	RY72	0.1819	0.2062	0.062	83.1484		2201	RY72	0.152	0.1712	0.049	84.2881		2201	RY72	0.1355	0.1397	0.0436809	95.6259
2202	2	2	1	Irrigation	RY9	0.1727	0.1827	0.0582	91.9679		2202	RY9	0.1773	0.1878	0.0586	91.8731		2202	RY9	0.1629	0.183	0.0508	84.7958		2202	RY9	0.1787	0.1891	0.058	92.0671		2202	RY9	0.142	0.1476	0.0460884	94.4834
2203	2	2	3	Irrigation	CMR38-125-77	0.1565	0.1655	0.0506	92.1671		2203	CMR38-125-77	0.1655	0.1823	0.0561	86.6878		2203	CMR38-125-77	0.1668	0.1808	0.052	89.1304		2203	CMR38-125-77	0.1488	0.1589	0.0476	90.9254		2203	CMR38-125-77	0.1535	0.1566	0.0491035	97.1162
2204	2	2	5	Irrigation	CMR35-91-63	0.1723	0.1783	0.0566	95.0698		2204	CMR35-91-63	0.18	0.2102	0.0594	79.9735		2204	CMR35-91-63	0.1946	0.221	0.065	83.0769		2204	CMR35-91-63	0.1837	0.1924	0.0602	93.4191		2204	CMR35-91-63	0.1579	0.1638	0.0517451	94.7347
2205	2	2	2	Irrigation	KU50	0.1648	0.1752	0.0589	91.0576		2205	KU50	0.1873	0.2019	0.0599	89.7183		2205	KU50	0.0777	0.0784	0.053	97.2441		2205	KU50	0.1708	0.1994	0.0546	80.2486		2205	KU50	0.1598	0.1653	0.0510836	95.1846
2206	2	2	6	Irrigation	CM523-7	0.1541	0.1597	0.0531	94.7467		2206	CM523-7	0.1636	0.1782	0.0561	88.0426		2206	CM523-7	0.0908	0.0981	0.045	86.2524		2206	CM523-7	0.1618	0.1746	0.0487	89.8332		2206	CM523-7	0.1552	0.1641	0.0467135	92.4182
3101	3	1	6	Rainfed	CM523-7	0.1448	0.157	0.0467	88.9393		3101	CM523-7	0.157	0.1761	0.0592	83.6612		3101	CM523-7	0.1993	0.201	0.053	98.8514		3101	CM523-7	0.1409	0.1768	0.0398	73.7956		3101	CM523-7	0.1567	0.1584	0.044263	98.5106
3102	3	1	5	Rainfed	CMR35-91-63	0.1804	0.1916	0.0568	91.6914		3102	CMR35-91-63	0.179	0.204	0.0652	81.9885		3102	CMR35-91-63	0.1877	0.1896	0.057	98.5671		3102	CMR35-91-63	0.1597	0.1723	0.0499	89.7059		3102	CMR35-91-63	0.1602	0.165	0.0500562	95.824
3103	3	1	1	Rainfed	RY9	0.182	0.1953	0.0626	89.9774		3103	RY9	0.1953	0.2237	0.0677	81.7949		3103	RY9	0.2004	0.23	0.054	83.1818		3103	RY9	0.1633	0.1756	0.0471	90.428		3103	RY9	0.1705	0.174	0.0501862	97.1732
3104	3	1	2	Rainfed	KU50	0.164	0.172	0.0543	93.2031		3104	KU50	0.1473	0.1707	0.0537	80		3104	KU50	0.415	0.4665	0.049	87.6647		3104	KU50	0.1418	0.1578	0.0422	86.1592		3104	KU50	0.1957	0.203	0.0582408	94.9571
3105	3	1	3	Rainfed	CMR38-125-77	0.1494	0.1618	0.0459	89.3011		3105	CMR38-125-77	0.1529	0.1586	0.0477	94.8602		3105	CMR38-125-77	0.4336	0.486	0.055	87.8422		3105	CMR38-125-77	0.157	0.1766	0.0518	84.2949		3105	CMR38-125-77	0.1734	0.1834	0.057211	92.0754
3106	3	1	4	Rainfed	RY72	0.1555	0.1657	0.0497	91.2069		3106	RY72	0.1617	0.188	0.0606	79.3564		3106	RY72	0.1976	0.1992	0.057	98.8748		3106	RY72	0.157	0.1601	0.0461	97.2807		3106	RY72	0.1642	0.1736	0.0482141	92.5031
3201	3	2	2	Irrigation	KU50	0.167	0.1755	0.0545	92.9752		3201	KU50	0.2042	0.2546	0.0605	74.034		3201	KU50	0.1625	0.165	0.054	97.7477		3201	KU50	0.1527	0.1753	0.0487	82.1485		3201	KU50	0.1473	0.1487	0.0469778	98.6237
3202	3	2	1	Irrigation	RY9	0.1912	0.2071	0.0651	88.8028		3202	RY9	0.1953	0.2195	0.055	85.2888		3202	RY9	0.1873	0.2035	0.054	89.1639		3202	RY9	0.1629	0.1753	0.0496	90.1352		3202	RY9	0.1833	0.1872	0.0558114	97.0317
3203	3	2	6	Irrigation	CM523-7	0.1453	0.1546	0.0454	91.4835		3203	CM523-7	0.1511	0.1756	0.0406	81.8519		3203	CM523-7	0.4382	0.4864	0.05	88.9551		3203	CM523-7	0.135	0.1414	0.0404	93.6634		3203	CM523-7	0.1341	0.1389	0.0401307	95.1402
3204	3	2	5	Irrigation	RY72	0.1537	0.1587	0.0509	95.3618		3204	RY72	0.2567	0.2727	0.0749	91.911		3204	RY72	0.177	0.179	0.052	98.4252		3204	RY72	0.1444	0.1512	0.0415	93.8013		3204	RY72	0.1503	0.1554	0.0431956	95.4547
3205	3	2	3	Irrigation	CMR38-125-77	0.245	0.2653	0.0828	88.8767		3205	CMR38-125-77	0.1894	0.2002	0.0532	92.6531		3205	CMR38-125-77	0.1845	0.1867	0.055	98.3295		3205	CMR38-125-77	0.1554	0.1836	0.0499	78.908		3205	CMR38-125-77	0.1692	0.1721	0.0543313	97.5375
3206	3	2	4	Irrigation	CMR35-91-63	0.1835	0.1933	0.0629	92.4847		3206	CMR35-91-63	0.1617	0.2059	0.0525	71.1864		3206	CMR35-91-63	0.1779	0.1858	0.049	94.2251		3206	CMR35-91-63	0.1541	0.1632	0.0458	92.2487		3206	CMR35-91-63	0.1453	0.1515	0.0431846	94.276
4101	4	1	3	Rainfed	CMR38-125-77	0.1538	0.1669	0.0506	88.736		4101	CMR38-125-77	0.2011	0.2257	0.0595	85.1986		4101	CMR38-125-77	0.4321	0.4988	0.057	84.9027		4101	CMR38-125-77	0.1609	0.1789	0.0503	86.0031		4101	CMR38-125-77	0.1678	0.1715	0.0524571	96.8919
4102	4	1	1	Rainfed	RY9	0.1764	0.1866	0.0592	91.9937		4102	RY9	0.2351	0.2701	0.0667	82.7925		4102	RY9	0.4421	0.4998	0.052	87.1148		4102	RY9	0.1535	0.1685	0.0452	87.8345		4102	RY9	0.1592	0.171	0.0468784	90.4932
4103	4	1	5	Rainfed	CMR35-91-63	0.1741	0.1805	0.0542	94.9327		4103	CMR35-91-63	0.228	0.2649	0.0636	81.6692		4103	CMR35-91-63	0.1732	0.2045	0.052	79.4754		4103	CMR35-91-63	0.1335	0.1447	0.0345	89.8367		4103	CMR35-91-63	0.158	0.1693	0.0408315	91.2041
4104	4	1	4	Rainfed	RY72	0.1565	0.162	0.0537	94.9215		4104	RY72	0.1912	0.2205	0.0672	80.8871		4104	RY72	0.4226	0.4826	0.051	86.0982		4104	RY72	0.1467	0.1612	0.0434	87.691		4104	RY72	0.1546	0.1648	0.0457372	91.4331
4105	4	1	6	Rainfed	CM523-7	0.1559	0.1669	0.0545	90.2135		4105	CM523-7	0.1933	0.2245	0.0703	79.7665		4105	CM523-7	0.1738	0.1881	0.05	89.6452		4105	CM523-7	0.1364	0.1499	0.0406	87.6487		4105	CM523-7	0.1428	0.1514	0.042505	92.1025
4106	4	1	2	Rainfed	KU50	0.1569	0.1686	0.0526	89.9138		4106	KU50	0.1784	0.201	0.0633	83.5875		4106	KU50	0.2031	0.2035	0.06	99.7213		4106	KU50	0.1604	0.1707	0.049	91.5366		4106	KU50	0.1606	0.1728	0.0490611	90.1405
4201	4	2	4	Irrigation	RY72	0.1524	0.1637	0.0499	90.0703		4201	RY72	0.1695	0.1876	0.064	85.356		4201	RY72	0.1601	0.1713	0.049	90.8422		4201	RY72	0.1521	0.1738	0.0469	82.8999		4201	RY72	0.1644	0.1667	0.0506927	98.0174
4202	4	2	5	Irrigation	CMR35-91-63	0.1959	0.2027	0.0615	95.1841		4202	CMR35-91-63	0.1749	0.1886	0.0645	88.9605		4202	CMR35-91-63	0.187	0.1898	0.048	98.0254		4202	CMR35-91-63	0.1545	0.1645	0.0494	91.3119		4202	CMR35-91-63	0.1617	0.1703	0.0517021	92.7486
4203	4	2	2	Irrigation	KU50	0.1749	0.1749	0.0326	100		4203	KU50	0.2078	0.2351	0.0759	82.8518		4203	KU50	0.4175	0.4445	0.047	93.2075		4203	KU50	0.1494	0.164	0.0466	87.5639		4203	KU50	0.1585	0.161	0.0494384	97.7591
4204	4	2	1	Irrigation	RY9	0.1762	0.1931	0.0584	87.4536		4204	RY9	0.165	0.2001	0.063	74.3982		4204	RY9	0.4403	0.4681	0.051	93.3349		4204	RY9	0.1531	0.1698	0.0499	86.0717		4204	RY9	0.1621	0.1693	0.0528334	93.818
4205	4	2	6	Irrigation	CM523-7	0.1556	0.163	0.0517	93.3513		4205	CM523-7	0.171	0.1931	0.0512	84.4257		4205	CM523-7	0.4108	0.4981	0.044	80.7752		4205	CM523-7	0.1315	0.1419	0.0397	89.8239		4205	CM523-7	0.1471	0.1558	0.0444097	92.1896
4206	4	2	3	Irrigation	CMR38-125-77	0.1556	0.1633	0.0518	93.0942		4206	CMR38-125-77	0.165	0.1868	0.0539	83.5967		4206	CMR38-125-77	0.203	0.2196	0.055	89.9149		4206	CMR38-125-77	0.1559	0.1675	0.0482	90.2766		4206	CMR38-125-77	0.1513	0.1609	0.0467778	91.588

## Sheet: RWC_Year 2
3 Months after planting											4 Months after planting							5 Months after planting							6 Months after planting							12 Months after planting
Plot No.	Rep	Main P	Sub P	Water	Var	fresh weight	turgid weight	dry weight	Relative water content		Plot No.	Var	fresh weight	turgid weight	dry weight	Relative water content		Plot No.	Var	fresh weight	turgid weight	dry weight	Relative water content		Plot No.	Var	fresh weight	turgid weight	dry weight	Relative water content		Plot No.	Var	fresh weight	turgid weight	dry weight	Relative water content
1101	1	1	1	Rainfed	RY9	0.1578	0.1766	0.0615	83.6664		1101	RY9	0.1629	0.1888	0.0634	79.3461		1101	RY9	0.1951	0.2104	0.0189	92.0104		1101	RY9	0.1858	0.1895	0.0596	97.1517		1101	RY9	0.1614	0.1715	0.053	91.4768
1102	1	1	2	Rainfed	KU50	0.1703	0.1814	0.0646	90.4966		1102	KU50	0.1914	0.2088	0.0815	86.3315		1102	KU50	0.1983	0.208	0.0413	94.1812		1102	KU50	0.1684	0.1685	0.0534	99.9131		1102	KU50	0.1576	0.1592	0.0469	98.5752
1103	1	1	3	Rainfed	CMR38-125-77	0.1776	0.1934	0.064	87.7898		1103	CMR38-125-77	0.1466	0.1597	0.0641	86.2971		1103	CMR38-125-77	0.1779	0.1879	0.0827	90.4943		1103	CMR38-125-77	0.191	0.1947	0.061	97.2326		1103	CMR38-125-77	0.1568	0.159	0.0515	97.9535
1104	1	1	5	Rainfed	CMR35-91-63	0.2119	0.2152	0.069	97.7428		1104	CMR35-91-63	0.1818	0.205	0.0646	83.4758		1104	CMR35-91-63	0.1944	0.2184	0.0357	86.8637		1104	CMR35-91-63	0.186	0.1945	0.0573	93.8047		1104	CMR35-91-63	0.1634	0.1888	0.049	81.8312
1105	1	1	4	Rainfed	RY72	0.1692	0.1741	0.059	95.7428		1105	RY72	0.1577	0.1716	0.0556	88.0172		1105	RY72	0.1672	0.1954	0.0281	83.1441		1105	RY72	0.1583	0.1661	0.0584	92.7577		1105	RY72	0.162	0.1651	0.0515	97.2711
1106	1	1	6	Rainfed	CM523-7	0.1523	0.1536	0.0528	98.7103		1106	CM523-7	0.1407	0.1559	0.0596	84.216		1106	CM523-7	0.1104	0.1304	0.0235	81.2909		1106	CM523-7	0.1646	0.1777	0.0538	89.427		1106	CM523-7	0.1507	0.1607	0.0469	91.2127
1201	1	2	2	Irrigation	KU50	0.1814	0.1923	0.0609	91.7047		1201	KU50	0.2053	0.2119	0.0656	95.4887		1201	KU50	0.197	0.2102	0.041	92.1986		1201	KU50	0.1741	0.1757	0.0547	98.6777		1201	KU50	0.1449	0.1455	0.0457	99.3988
1202	1	2	3	Irrigation	CMR38-125-77	0.1772	0.1818	0.0608	96.1983		1202	CMR38-125-77	0.2054	0.2182	0.0573	92.0447		1202	CMR38-125-77	0.2128	0.2377	0.031	87.9536		1202	CMR38-125-77	0.1823	0.1943	0.058	91.1959		1202	CMR38-125-77	0.1586	0.1634	0.0551	95.5679
1203	1	2	5	Irrigation	CMR35-91-63	0.1851	0.1907	0.0553	95.8641		1203	CMR35-91-63	0.2077	0.2194	0.067	92.3228		1203	CMR35-91-63	0.1581	0.1716	0.0233	90.8968		1203	CMR35-91-63	0.1755	0.1879	0.0531	90.8012		1203	CMR35-91-63	0.1694	0.1772	0.0536	93.6893
1204	1	2	1	Irrigation	RY9	0.2002	0.2103	0.0636	93.1152		1204	RY9	0.2506	0.2626	0.07	93.7695		1204	RY9	0.186	0.1942	0.0718	93.3007		1204	RY9	0.1736	0.1852	0.0547	91.1111		1204	RY9	0.2017	0.2083	0.0614	95.5071
1205	1	2	4	Irrigation	RY72	0.1688	0.1713	0.0551	97.8485		1205	RY72	0.181	0.1858	0.0548	96.3359		1205	RY72	0.1982	0.2196	0.0828	84.3567		1205	RY72	0.154	0.1623	0.0493	92.6549		1205	RY72	0.1663	0.1735	0.0543	93.9597
1206	1	2	6	Irrigation	CM523-7	0.1798	0.1842	0.0527	96.654		1206	CM523-7	0.2275	0.2422	0.0608	91.8964		1206	CM523-7	0.1097	0.1224	0.0174	87.9048		1206	CM523-7	0.1608	0.1787	0.0512	85.9608		1206	CM523-7	0.1411	0.151	0.0443	90.7216
2101	2	1	1	Rainfed	RY9	0.17	0.1736	0.0586	96.8696		2101	RY9	0.1623	0.1805	0.0571	85.2512		2101	RY9	0.1772	0.204	0.0178	85.6069		2101	RY9	0.168	0.1862	0.0552	86.1069		2101	RY9	0.1501	0.157	0.0504	93.5272
2102	2	1	4	Rainfed	RY72	0.1857	0.1952	0.0599	92.9786		2102	RY72	0.2075	0.2353	0.0122	87.5392		2102	RY72	0.1413	0.151	0.0284	92.0881		2102	RY72	0.1749	0.1902	0.0656	87.7207		2102	RY72	0.1634	0.171	0.0542	93.4932
2103	2	1	3	Rainfed	CMR38-125-77	0.1668	0.1703	0.0551	96.9618		2103	CMR38-125-77	0.1468	0.1687	0.0106	86.148		2103	CMR38-125-77	0.1738	0.1803	0.064	94.411		2103	CMR38-125-77	0.1632	0.167	0.0579	96.517		2103	CMR38-125-77	0.1432	0.1557	0.0494	88.2408
2104	2	1	6	Rainfed	CM523-7	0.1683	0.1774	0.0546	92.5896		2104	CM523-7	0.1993	0.2132	0.0701	90.2865		2104	CM523-7	0.1553	0.169	0.0469	88.7797		2104	CM523-7	0.1624	0.1776	0.0603	87.0418		2104	CM523-7	0.1481	0.1599	0.0511	89.1544
2105	2	1	5	Rainfed	CMR35-91-63	0.16	0.1705	0.058	90.6667		2105	CMR35-91-63	0.203	0.2146	0.0653	92.2304		2105	CMR35-91-63	0.176	0.189	0.0481	90.7736		2105	CMR35-91-63	0.1807	0.1994	0.0578	86.7938		2105	CMR35-91-63	0.1763	0.185	0.053	93.4091
2106	2	1	2	Rainfed	KU50	0.1539	0.1682	0.0545	87.423		2106	KU50	0.1736	0.1924	0.0622	85.5607		2106	KU50	0.1697	0.1758	0.0234	95.9974		2106	KU50	0.154	0.1714	0.0515	85.4879		2106	KU50	0.166	0.1731	0.0469	94.374
2201	2	2	4	Irrigation	RY72	0.1672	0.1687	0.0574	98.6523		2201	RY72	0.1837	0.1878	0.0633	96.7068		2201	RY72	0.1761	0.1861	0.0642	91.7966		2201	RY72	0.1514	0.1607	0.0499	91.6065		2201	RY72	0.1355	0.1397	0.0429	95.6612
2202	2	2	1	Irrigation	RY9	0.1935	0.1971	0.0627	97.3214		2202	RY9	0.1987	0.2026	0.0631	97.2043		2202	RY9	0.1901	0.192	0.0401	98.7492		2202	RY9	0.1809	0.1925	0.0574	91.4138		2202	RY9	0.142	0.1476	0.0416	94.717
2203	2	2	3	Irrigation	CMR38-125-77	0.1579	0.1647	0.0526	93.934		2203	CMR38-125-77	0.177	0.1814	0.0583	96.4257		2203	CMR38-125-77	0.1729	0.1865	0.0298	91.321		2203	CMR38-125-77	0.1598	0.1724	0.0538	89.3761		2203	CMR38-125-77	0.1535	0.1566	0.0489	97.1216
2204	2	2	5	Irrigation	CMR35-91-63	0.2159	0.2232	0.0644	95.403		2204	CMR35-91-63	0.2555	0.2631	0.0676	96.1125		2204	CMR35-91-63	0.2226	0.2265	0.0316	97.999		2204	CMR35-91-63	0.1731	0.1873	0.0548	89.283		2204	CMR35-91-63	0.1579	0.1638	0.0454	95.0169
2205	2	2	2	Irrigation	KU50	0.1543	0.1648	0.0531	90.5998		2205	KU50	0.1854	0.1899	0.054	96.6887		2205	KU50	0.1887	0.1939	0.0527	96.3173		2205	KU50	0.1664	0.1799	0.055	89.1914		2205	KU50	0.1598	0.1653	0.0474	95.335
2206	2	2	6	Irrigation	CM523-7	0.1491	0.1521	0.0502	97.0559		2206	CM523-7	0.1583	0.1697	0.053	90.2314		2206	CM523-7	0.1658	0.1747	0.0347	93.6429		2206	CM523-7	0.1609	0.1692	0.0541	92.7889		2206	CM523-7	0.1552	0.1641	0.046	92.464
3101	3	1	6	Rainfed	CM523-7	0.1446	0.1539	0.0496	91.0834		3101	CM523-7	0.1568	0.1726	0.0629	85.5971		3101	CM523-7	0.1234	0.1319	0.0347	91.2551		3101	CM523-7	0.1587	0.1755	0.0552	86.0349		3101	CM523-7	0.1567	0.1584	0.0493	98.4418
3102	3	1	5	Rainfed	CMR35-91-63	0.1857	0.1901	0.0596	96.6284		3102	CMR35-91-63	0.1843	0.2024	0.0684	86.4925		3102	CMR35-91-63	0.1994	0.2124	0.0635	91.2693		3102	CMR35-91-63	0.1947	0.2058	0.0583	92.4746		3102	CMR35-91-63	0.1602	0.165	0.0437	96.0429
3103	3	1	1	Rainfed	RY9	0.1524	0.1616	0.0523	91.5828		3103	RY9	0.1635	0.1851	0.0566	83.1907		3103	RY9	0.0863	0.0878	0.0337	97.2274		3103	RY9	0.1605	0.1766	0.0628	85.8524		3103	RY9	0.1705	0.174	0.0474	97.2354
3104	3	1	2	Rainfed	KU50	0.1571	0.1697	0.0571	88.8099		3104	KU50	0.1411	0.1684	0.0565	75.6032		3104	KU50	0.1531	0.174	0.0291	85.5763		3104	KU50	0.1559	0.1677	0.0608	88.9616		3104	KU50	0.1957	0.203	0.0554	95.0542
3105	3	1	3	Rainfed	CMR38-125-77	0.1781	0.1858	0.0592	93.9179		3105	CMR38-125-77	0.1623	0.1821	0.0615	83.5821		3105	CMR38-125-77	0.1257	0.1449	0.0585	77.7778		3105	CMR38-125-77	0.1863	0.1976	0.0636	91.5672		3105	CMR38-125-77	0.1734	0.1834	0.0503	92.4869
3106	3	1	4	Rainfed	RY72	0.1464	0.1552	0.053	91.3894		3106	RY72	0.1622	0.1761	0.0646	87.5336		3106	RY72	0.181	0.2026	0.019	88.2353		3106	RY72	0.1767	0.1884	0.0582	91.0138		3106	RY72	0.1642	0.1736	0.0497	92.4132
3201	3	2	2	Irrigation	KU50	0.1389	0.1402	0.0494	98.5683		3201	KU50	0.1998	0.2034	0.0548	97.5774		3201	KU50	0.139	0.1476	0.0481	91.3568		3201	KU50	0.1883	0.2154	0.0602	82.5387		3201	KU50	0.1473	0.1487	0.048	98.6097
3202	3	2	1	Irrigation	RY9	0.1597	0.1627	0.0533	97.2578		3202	RY9	0.1631	0.1724	0.045	92.7002		3202	RY9	0.1742	0.18	0.0715	94.6544		3202	RY9	0.1655	0.1669	0.0552	98.7466		3202	RY9	0.1833	0.1872	0.0541	97.0699
3203	3	2	6	Irrigation	CM523-7	0.169	0.1763	0.0539	94.0359		3203	CM523-7	0.1957	0.2002	0.0482	97.0395		3203	CM523-7	0.2018	0.2082	0.0762	95.1515		3203	CM523-7	0.1631	0.1733	0.0529	91.5282		3203	CM523-7	0.1341	0.1389	0.0399	95.1515
3204	3	2	5	Irrigation	RY72	0.1715	0.1829	0.0567	90.9667		3204	RY72	0.2064	0.2234	0.0834	87.8571		3204	RY72	0.1582	0.1958	0.0542	73.4463		3204	RY72	0.1666	0.1674	0.0569	99.276		3204	RY72	0.1503	0.1554	0.0439	95.426
3205	3	2	3	Irrigation	CMR38-125-77	0.1961	0.2064	0.0624	92.8472		3205	CMR38-125-77	0.1516	0.1558	0.0401	96.3699		3205	CMR38-125-77	0.1469	0.1535	0.0178	95.1363		3205	CMR38-125-77	0.1739	0.1844	0.0601	91.5527		3205	CMR38-125-77	0.1692	0.1721	0.0504	97.6171
3206	3	2	4	Irrigation	CMR35-91-63	0.1662	0.1721	0.056	94.9182		3206	CMR35-91-63	0.1865	0.1883	0.0467	98.7288		3206	CMR35-91-63	0.1908	0.1913	0.034	99.6821		3206	CMR35-91-63	0.176	0.1847	0.0568	93.1978		3206	CMR35-91-63	0.1453	0.1515	0.0433	94.2699
4101	4	1	3	Rainfed	CMR38-125-77	0.151	0.1538	0.0534	97.2112		4101	CMR38-125-77	0.1874	0.208	0.0628	85.8127		4101	CMR38-125-77	0.1627	0.1666	0.0287	97.1719		4101	CMR38-125-77	0.1481	0.1599	0.0541	88.8469		4101	CMR38-125-77	0.1678	0.1715	0.0531	96.875
4102	4	1	1	Rainfed	RY9	0.1445	0.1493	0.0478	95.2709		4102	RY9	0.1926	0.2161	0.0529	85.6005		4102	RY9	0.2008	0.2067	0.0051	97.0734		4102	RY9	0.2011	0.2215	0.076	85.9794		4102	RY9	0.1592	0.171	0.05	90.2479
4103	4	1	5	Rainfed	CMR35-91-63	0.1435	0.1535	0.0499	90.3475		4103	CMR35-91-63	0.1879	0.2153	0.0586	82.5144		4103	CMR35-91-63	0.1692	0.1703	0.0491	99.0924		4103	CMR35-91-63	0.1792	0.1913	0.0617	90.6636		4103	CMR35-91-63	0.158	0.1693	0.0514	90.4156
4104	4	1	4	Rainfed	RY72	0.1473	0.1634	0.0523	85.5086		4104	RY72	0.2	0.2224	0.0654	85.7325		4104	RY72	0.1844	0.1956	0.037	92.9382		4104	RY72	0.1582	0.1699	0.0538	89.9225		4104	RY72	0.1546	0.1648	0.054	90.7942
4105	4	1	6	Rainfed	CM523-7	0.1753	0.1837	0.0606	93.1763		4105	CM523-7	0.2175	0.2471	0.0782	82.4748		4105	CM523-7	0.1709	0.1772	0.0682	94.2202		4105	CM523-7	0.1469	0.163	0.05	85.7522		4105	CM523-7	0.1428	0.1514	0.0444	91.9626
4106	4	1	2	Rainfed	KU50	0.169	0.181	0.0569	90.3304		4106	KU50	0.1922	0.2158	0.0685	83.9783		4106	KU50	0.1763	0.178	0.0534	98.6356		4106	KU50	0.1276	0.1416	0.0451	85.4922		4106	KU50	0.1606	0.1728	0.0561	89.5458
4201	4	2	4	Irrigation	RY72	0.1519	0.1583	0.047	94.2498		4201	RY72	0.1689	0.1814	0.0603	89.678		4201	RY72	0.1868	0.1951	0.0594	93.8836		4201	RY72	0.1284	0.1372	0.0453	90.4244		4201	RY72	0.1644	0.1667	0.0526	97.9842
4202	4	2	5	Irrigation	CMR35-91-63	0.1811	0.198	0.0515	88.4642		4202	CMR35-91-63	0.1817	0.1842	0.054	98.0799		4202	CMR35-91-63	0.2218	0.2292	0.0674	95.4265		4202	CMR35-91-63	0.1719	0.1785	0.0532	94.7326		4202	CMR35-91-63	0.1617	0.1703	0.0534	92.6433
4203	4	2	2	Irrigation	KU50	0.1611	0.1673	0.0493	94.7458		4203	KU50	0.2214	0.2249	0.1148	96.8211		4203	KU50	0.2311	0.2409	0.0689	94.3023		4203	KU50	0.1677	0.1823	0.0546	88.567		4203	KU50	0.1585	0.161	0.0512	97.7231
4204	4	2	1	Irrigation	RY9	0.182	0.1972	0.0574	89.1273		4204	RY9	0.1904	0.2043	0.0619	90.2388		4204	RY9	0.1336	0.1404	0.0305	93.8126		4204	RY9	0.1706	0.1792	0.0546	93.0979		4204	RY9	0.1621	0.1693	0.0594	93.4486
4205	4	2	6	Irrigation	CM523-7	0.1732	0.1836	0.0518	92.1093		4205	CM523-7	0.1903	0.2175	0.0513	83.6342		4205	CM523-7	0.1595	0.1697	0.0429	91.9558		4205	CM523-7	0.165	0.1802	0.0549	87.8691		4205	CM523-7	0.1471	0.1558	0.0467	92.0257
4206	4	2	3	Irrigation	CMR38-125-77	0.1794	0.1876	0.0577	93.6875		4206	CMR38-125-77	0.2102	0.2146	0.066	97.039		4206	CMR38-125-77	0.1507	0.1695	0.0406	85.4151		4206	CMR38-125-77	0.1751	0.1971	0.0586	84.1155		4206	CMR38-125-77	0.1513	0.1609	0.0501	91.3357

## Sheet: Starch_Year 1 and 2
2021/2022										2022/2023
Plot No	Water	Var	Rep	Main P	Sub P	Starch content	storage root dry weight	Starch yield		Plot No	Var	Rep	Main P	Sub P	Starch content	storage root dry weight	Starch yield
1101	Rainfed	RY9	1	1	2	24	3834.55	92029.2		1101	RY9	1	1	2	27.6	2016.13	55645.1
1102	Rainfed	KU50	1	1	1	28.5	4032.25	114919		1102	KU50	1	1	1	24	1917.27	46014.6
1103	Rainfed	CMR38-125-77	1	1	4	30.9	4884	150915		1103	CMR38-125-77	1	1	4	28.7	1902.19	54592.9
1104	Rainfed	CMR35-91-63	1	1	5	24	3610.82	86659.6		1104	CMR35-91-63	1	1	5	27.7	1923.72	53286.9
1105	Rainfed	RY72	1	1	3	27.6	3804.38	105001		1105	RY72	1	1	3	30.7	2442	74969.3
1106	Rainfed	CM523-7	1	1	6	23	3552.13	81699.1		1106	CM523-7	1	1	6	25	1776.07	44401.7
1201	Irrigation	KU50	1	2	1	21.9	2797.52	61265.6		1201	KU50	1	2	1	28.5	1203.49	34299.5
1202	Irrigation	CMR38-125-77	1	2	4	30.1	3481.05	104779		1202	CMR38-125-77	1	2	4	27	604.151	16312.1
1203	Irrigation	CMR35-91-63	1	2	5	30.7	552.564	16963.7		1203	CMR35-91-63	1	2	5	20	1533.96	30679.2
1204	Irrigation	RY9	1	2	2	25.8	2406.98	62100.2		1204	RY9	1	2	2	26.4	1398.76	36927.2
1205	Irrigation	RY72	1	2	3	25.8	1521.88	39264.5		1205	RY72	1	2	3	23.9	1740.52	41598.5
1206	Irrigation	CM523-7	1	2	6	16.1	292.218	4704.71		1206	CM523-7	1	2	6	25.6	1487.86	38089.1
2101	Rainfed	RY9	2	1	2	28.7	3642.97	104553		2101	RY9	2	1	2	28.85	1724.36	49747.7
2102	Rainfed	RY72	2	1	3	27.9	4478.59	124953		2102	RY72	2	1	3	25.8	2291.13	59111.3
2103	Rainfed	CMR38-125-77	2	1	4	27.8	4582.27	127387		2103	CMR38-125-77	2	1	4	27.9	2239.29	62476.3
2104	Rainfed	CM523-7	2	1	6	20.1	3378.7	67911.9		2104	CM523-7	2	1	6	23.05	1689.35	38939.5
2105	Rainfed	CMR35-91-63	2	1	5	27.7	3922.38	108650		2105	CMR35-91-63	2	1	5	26.8	1961.19	52559.9
2106	Rainfed	KU50	2	1	1	26.8	3448.71	92425.5		2106	KU50	2	1	1	26.85	2567.5	68937.4
2201	Irrigation	RY72	2	2	3	21.8	1835.46	40012.9		2201	RY72	2	2	3	23.9	1515.93	36230.8
2202	Irrigation	RY9	2	2	2	26	2531.18	65810.8		2202	RY9	2	2	2	28	1826.75	51149
2203	Irrigation	CMR38-125-77	2	2	4	25	3031.86	75796.6		2203	CMR38-125-77	2	2	4	25.15	917.728	23080.9
2204	Irrigation	CMR35-91-63	2	2	5	23.7	559.217	13253.4		2204	CMR35-91-63	2	2	5	21.7	1533.96	33286.9
2205	Irrigation	KU50	2	2	1	22.4	3653.5	81838.4		2205	KU50	2	2	1	27.9	1265.59	35310
2206	Irrigation	CM523-7	2	2	6	14.2	254.251	3610.37		2206	CM523-7	2	2	6	26.1	1737.11	45338.6
3101	Rainfed	CM523-7	3	1	6	15.8	3508.78	55438.7		3101	CM523-7	3	1	6	22.4	1732.71	38812.7
3102	Rainfed	CMR35-91-63	3	1	5	21.6	3772.48	81485.5		3102	CMR35-91-63	3	1	5	27.25	1886.24	51400
3103	Rainfed	RY9	3	1	2	27.3	3937.01	107480		3103	RY9	3	1	2	28.225	2410.48	68035.7
3104	Rainfed	KU50	3	1	1	29.7	4820.95	143182		3104	KU50	3	1	1	26.44	1968.5	52047.2
3105	Rainfed	CMR38-125-77	3	1	4	26.4	4522.3	119389		3105	CMR38-125-77	3	1	4	27.8	2015.36	56027
3106	Rainfed	RY72	3	1	3	28	4030.72	112860		3106	RY72	3	1	3	25.8	2366.57	61057.4
3201	Irrigation	KU50	3	2	1	25.1	3087.21	77489.1		3201	KU50	3	2	1	27.3	1554.31	42432.6
3202	Irrigation	RY9	3	2	2	24.4	3108.62	75850.3		3202	RY9	3	2	2	25.1	1543.61	38744.5
3203	Irrigation	CM523-7	3	2	6	15	216.284	3244.26		3203	CM523-7	3	2	6	25.85	1612.48	41682.7
3204	Irrigation	RY72	3	2	3	22.8667	1208.3	27629.9		3204	RY72	3	2	3	23.9	1441.07	34441.5
3205	Irrigation	CMR38-125-77	3	2	4	27.55	2882.13	79402.8		3205	CMR38-125-77	3	2	4	25.15	604.151	15194.4
3206	Irrigation	CMR35-91-63	3	2	5	23.9	555.89	13285.8		3206	CMR35-91-63	3	2	5	21	1533.96	32213.2
4101	Rainfed	CMR38-125-77	4	1	4	27	4100.62	110717		4101	CMR38-125-77	4	1	4	28.13	2052.28	57730.7
4102	Rainfed	RY9	4	1	2	26.6667	3348.94	89305.2		4102	RY9	4	1	2	30.1	2050.32	61714.6
4103	Rainfed	CMR35-91-63	4	1	5	24.4333	3137.59	76661.8		4103	CMR35-91-63	4	1	5	26	1942.45	50503.8
4104	Rainfed	RY72	4	1	3	23.3	4104.56	95636.3		4104	RY72	4	1	3	28.25	2050.31	57921.2
4105	Rainfed	CM523-7	4	1	6	15.6	3465.42	54060.5		4105	CM523-7	4	1	6	23.7	1732.71	41065.2
4106	Rainfed	KU50	4	1	1	28.5	4100.64	116868		4106	KU50	4	1	1	24	1674.47	40187.3
4201	Irrigation	RY72	4	2	3	21	581.15	12204.2		4201	RY72	4	2	3	23.9	1590.8	38020
4202	Irrigation	CMR35-91-63	4	2	5	22.05	545.91	12037.3		4202	CMR35-91-63	4	2	5	21.7	1533.96	33286.9
4203	Irrigation	KU50	4	2	1	25.6	3179.41	81392.9		4203	KU50	4	2	1	29.7	1341.13	39831.6
4204	Irrigation	RY9	4	2	2	26.1	2682.26	70007		4204	RY9	4	2	2	24.4	1589.71	38788.8
4205	Irrigation	CM523-7	4	2	6	24.5833	368.152	9050.41		4205	CM523-7	4	2	6	25.975	1674.8	43502.9
4206	Irrigation	CMR38-125-77	4	2	4	25.3417	3181.59	80626.8		4206	CMR38-125-77	4	2	4	23.3	290.575	6770.4

## Sheet: Soil moisture_Year 1
soil depth at 0-30 cm												soil depth at 30-60 cm
Plot No	Water	Var	Main	Sub	Rep	3 MAP	4 MAP	5 MAP	6 MAP	12 MAP		Plot No	Var	Main	Sub	Rep	3 MAP	4 MAP	5 MAP	6 MAP	12 MAP
1101	Rainfed	RY9	1	1	1	10.4646	5.8311	4.63	13.08	13.48		1101	RY9	1	1	1	9.83837	9.49	7.22	11.48	11.79
1102	Rainfed	KU50	1	2	1	8.68519	5.60739	4.17333	13.59	12.6833		1102	KU50	1	2	1	10.8248	8.23	6.43	11.86	12.92
1103	Rainfed	CMR38-125-77	1	3	1	10.1266	5.15903	2.4	11.79	13.295		1103	CMR38-125-77	1	3	1	11.9409	9.09	5.7675	9.87	11.08
1104	Rainfed	CMR35-91-63	1	4	1	10.2458	6.49849	3.94	12.15	13.32		1104	CMR35-91-63	1	4	1	10.6181	9.64	5.94	11.07	12.37
1105	Rainfed	RY72	1	5	1	10.7299	5.73763	5.3	11.54	12.49		1105	RY72	1	5	1	9.15617	8.89	5.45	9.69	11.93
1106	Rainfed	CM523-7	1	6	1	9.75365	5.9494	4.31	12.12	12.02		1106	CM523-7	1	6	1	9.92181	9.87	6.30667	10.21	11.91
1201	Irrigation	RY9	2	1	1	9.78	12.01	10.74	13.42	11.52		1201	RY9	2	1	1	10.28	9.11	8.9	12.4	12.12
1202	Irrigation	KU50	2	2	1	10.15	11.28	11.25	12.4333	12.55		1202	KU50	2	2	1	9.22	9.435	9.01	10.31	9.91
1203	Irrigation	CMR38-125-77	2	3	1	9.55	11.25	11.15	13.7	12.19		1203	CMR38-125-77	2	3	1	10.3333	9.62	9.35	11.5967	12.83
1204	Irrigation	CMR35-91-63	2	4	1	9.81	11.09	10.41	12.7267	10.96		1204	CMR35-91-63	2	4	1	9.9	9.08	9.47	13.07	12.58
1205	Irrigation	RY72	2	5	1	8.44	12.12	10.1	11.41	13.0133		1205	RY72	2	5	1	10.05	10.71	9.62	10.15	11.08
1206	Irrigation	CM523-7	2	6	1	9.32	10.39	10.6	11.99	12.74		1206	CM523-7	2	6	1	9.37	9.77	8.21	11.5	13.44
2101	Rainfed	RY9	1	1	2	9.45394	5.74	4.27	10.83	13.07		2101	RY9	1	1	2	10.42	9.165	6.03	10.84	11.65
2102	Rainfed	KU50	1	2	2	9.70822	7.04	4.73	11.63	12.11		2102	KU50	1	2	2	9.56	8.56	6.95	11.03	12.79
2103	Rainfed	CMR38-125-77	1	3	2	9.13481	5.62451	3.21	10.76	13		2103	CMR38-125-77	1	3	2	11.21	7.71	5.67	9.02	11.71
2104	Rainfed	CMR35-91-63	1	4	2	9.43912	8	5.1	11.48	12.75		2104	CMR35-91-63	1	4	2	8.97	8.79	5.77	9.59	11.71
2105	Rainfed	RY72	1	5	2	10.1711	6.53	4.13	11.73	12.86		2105	RY72	1	5	2	9.24	9.04	5.92	9.79	11.36
2106	Rainfed	CM523-7	1	6	2	10.0805	5.81	3.36	11.1	11.23		2106	CM523-7	1	6	2	9.25	8.47	6.34	9.76	11.19
2201	Irrigation	RY9	2	1	2	10.49	12.01	12.05	12.39	13.24		2201	RY9	2	1	2	10.2	10.43	9.72	13.98	11.57
2202	Irrigation	KU50	2	2	2	9.45	10.83	11.79	13.02	14.25		2202	KU50	2	2	2	9.83	9.52	9.36	11.51	8.06
2203	Irrigation	CMR38-125-77	2	3	2	10.74	11.91	11.66	13.09	13.22		2203	CMR38-125-77	2	3	2	9.83	8.815	9.29	10.93	11.39
2204	Irrigation	CMR35-91-63	2	4	2	7.21	13.29	12.42	13.37	12.25		2204	CMR35-91-63	2	4	2	11.2	9.21	10.4667	13.61	11.63
2205	Irrigation	RY72	2	5	2	8.92	10.78	11.19	10.54	12.33		2205	RY72	2	5	2	9.62	11.04	9.66	11.53	11.7
2206	Irrigation	CM523-7	2	6	2	9.81	10.945	11.81	12.42	11.76		2206	CM523-7	2	6	2	8.79	10.27	9.57	10.04	11.53
3101	Rainfed	RY9	1	1	3	10.47	5.95	4.99	12.93	11.78		3101	RY9	1	1	3	9.52	8.53	6.86	11.16	11.49
3102	Rainfed	KU50	1	2	3	10.05	6.43	4.35	10.89	13.68		3102	KU50	1	2	3	9.55	8.08	6.52	10.99	13.42
3103	Rainfed	CMR38-125-77	1	3	3	8.64	6.09	3.53	9.82	13.295		3103	CMR38-125-77	1	3	3	10.907	7.8	5.51	9.445	12.07
3104	Rainfed	CMR35-91-63	1	4	3	10.2516	5.86	4.03	10.94	12.86		3104	CMR35-91-63	1	4	3	8.79	8.89	6.35	9.53	11.02
3105	Rainfed	RY72	1	5	3	9.19	5.8	4.01	10.52	12.41		3105	RY72	1	5	3	9.61	8.97	6.77	8.9	12.94
3106	Rainfed	CM523-7	1	6	3	10.2547	7.09	3.53	12.2	12.97		3106	CM523-7	1	6	3	9.87	8.64	6.93	9.44	11.54
3201	Irrigation	RY9	2	1	3	9.81333	12.94	12.27	14.26	12.87		3201	RY9	2	1	3	10.36	10.37	9.19	12.09	10.62
3202	Irrigation	KU50	2	2	3	8.68	10.45	10.81	12.02	13.69		3202	KU50	2	2	3	9.11	9.435	9.51667	9.3	8.21
3203	Irrigation	CMR38-125-77	2	3	3	9.28	10.51	12.12	14.31	12.8933		3203	CMR38-125-77	2	3	3	10.02	9.15	10.51	12.26	12.32
3204	Irrigation	CMR35-91-63	2	4	3	10.82	12.19	10.35	12.24	12.69		3204	CMR35-91-63	2	4	3	9.77	8.76	11.71	13.34	11.97
3205	Irrigation	RY72	2	5	3	10.27	11.92	12.36	10.975	13.99		3205	RY72	2	5	3	10.49	11.04	10.46	12.28	11.7
3206	Irrigation	CM523-7	2	6	3	10.85	11.5	12.77	13.85	13.72		3206	CM523-7	2	6	3	10.78	10.95	9.33667	10.77	12.6
4101	Rainfed	RY9	1	1	4	11.47	5.71	4.63	12.35	12.7767		4101	RY9	1	1	4	10.69	9.8	6.70333	11.16	11.6433
4102	Rainfed	KU50	1	2	4	9.48114	6.35913	3.44	11.04	12.26		4102	KU50	1	2	4	10.22	7.24	6.63333	10.08	14.54
4103	Rainfed	CMR38-125-77	1	3	4	9.30046	5.62451	3.15	9.53	13.59		4103	CMR38-125-77	1	3	4	9.57	7.57	6.44	8.59	13.41
4104	Rainfed	CMR35-91-63	1	4	4	11.07	6.78616	3.13	12.77	14.35		4104	CMR35-91-63	1	4	4	9.67	9.10667	4.13	9.87	11.7
4105	Rainfed	RY72	1	5	4	10.0303	6.02254	3.52	9.19	12.2		4105	RY72	1	5	4	8.92	8.96667	6.04667	9.46	11.49
4106	Rainfed	CM523-7	1	6	4	10.93	7.33	3.27	11.75	12.0733		4106	CM523-7	1	6	4	10.55	8.99333	5.65	9.63	13
4201	Irrigation	RY9	2	1	4	9.17	11.08	10.28	13.61	13.85		4201	RY9	2	1	4	10.28	10.57	10.15	12.8233	11.4367
4202	Irrigation	KU50	2	2	4	10.42	10.78	9.93	12.26	14.27		4202	KU50	2	2	4	10.78	9.35	10.18	10.12	8.72667
4203	Irrigation	CMR38-125-77	2	3	4	10.09	10.54	11.6433	13.7	13.27		4203	CMR38-125-77	2	3	4	11.15	8.48	9.71667	11.6	12.32
4204	Irrigation	CMR35-91-63	2	4	4	11.83	12.19	11.06	12.57	13.1		4204	CMR35-91-63	2	4	4	10.62	9.66	10.22	13.34	10.61
4205	Irrigation	RY72	2	5	4	10.35	11.6067	11.11	10.975	12.72		4205	RY72	2	5	4	11.01	10.93	10.42	12.16	11.695
4206	Irrigation	CM523-7	2	6	4	10.1	10.945	12.18	13.66	12.74		4206	CM523-7	2	6	4	9.64667	10.09	10.23	11.5	12.6025

## Sheet: Soil moisture_Year 2
soil depth at 0-30 cm												soil depth at 30-60 cm
Plot No	Water	Var	Main	Sub	Rep	3 MAP	4 MAP	5 MAP	6 MAP	12 MAP		Plot No	Var	Main	Sub	Rep	3 MAP	4 MAP	5 MAP	6 MAP	12 MAP
1101	Rainfed	RY9	1	1	1	10.7492	7.67244	4.81835	11.1036	10.4041		1101	RY9	1	1	1	9.8167	10.2528	7.97345	7.76946	10.2528
1102	Rainfed	KU50	1	2	1	11.6182	5.80753	4.58546	11.0242	9.80123		1102	KU50	1	2	1	12.966	9.64187	7.29688	8.4636	9.64187
1103	Rainfed	CMR38-125-77	1	3	1	10.4838	5.70762	4.57366	10.6011	9.4173		1103	CMR38-125-77	1	3	1	9.74184	9.89674	13.0749	6.93016	9.89674
1104	Rainfed	CMR35-91-63	1	4	1	7.82423	6.34693	4.63967	11.0361	9.68447		1104	CMR35-91-63	1	4	1	10.5602	10.0083	7.61246	5.54995	10.0083
1105	Rainfed	RY72	1	5	1	11.355	6.68312	4.62653	12.4927	10.8629		1105	RY72	1	5	1	9.04233	9.00744	8.30571	6.85151	9.00744
1106	Rainfed	CM523-7	1	6	1	9.54978	6.0854	5.67522	12.8409	10.0596		1106	CM523-7	1	6	1	11.4281	10.5535	9.38224	7.99839	7.34528
1201	Irrigation	RY9	2	1	1	9.30682	8.82251	9.12962	13.6904	10.2346		1201	RY9	2	1	1	10.8872	9.88667	9.74753	8.82625	9.88667
1202	Irrigation	KU50	2	2	1	9.49164	9.04188	10.1095	12.3834	11.397		1202	KU50	2	2	1	10.4773	12.7558	8.85689	9.15487	10.7558
1203	Irrigation	CMR38-125-77	2	3	1	13.7023	10.178	9.69404	14.2586	10.5975		1203	CMR38-125-77	2	3	1	11.7766	11.9941	10.4322	9.27081	9.99409
1204	Irrigation	CMR35-91-63	2	4	1	11.0706	8.99989	10.6197	14.1271	11.1171		1204	CMR35-91-63	2	4	1	10.147	11.873	10.0667	10.5946	10.873
1205	Irrigation	RY72	2	5	1	10.7052	9.92835	11.3974	11.871	11.4367		1205	RY72	2	5	1	10.1575	11.8345	10.4805	9.59885	11.8345
1206	Irrigation	CM523-7	2	6	1	10.4696	10.0156	10.5028	11.4423	10.3722		1206	CM523-7	2	6	1	10.9897	11.4423	10.0032	11.0649	11.4423
2101	Rainfed	RY9	1	1	2	9.68961	4.49709	3.49494	9.30554	9.07046		2101	RY9	1	1	2	10.4363	10.5621	8.02449	6.03341	10.5621
2102	Rainfed	KU50	1	2	2	10.067	5.64371	4.48334	8.39914	10.6273		2102	KU50	1	2	2	9.61672	10.1786	7.95467	8.47792	10.1786
2103	Rainfed	CMR38-125-77	1	3	2	13.674	6.58193	3.86687	5.33562	10.8046		2103	CMR38-125-77	1	3	2	11.6933	9.79434	8.31468	7.73206	9.79434
2104	Rainfed	CMR35-91-63	1	4	2	10.4224	8.73476	4.58603	11.0433	10.7085		2104	CMR35-91-63	1	4	2	11.6138	9.97462	9.08044	9.25271	11.4008
2105	Rainfed	RY72	1	5	2	11.9131	10.8172	5.78212	8.28733	10.034		2105	RY72	1	5	2	10.065	10.9517	8.91535	7.62222	10.9517
2106	Rainfed	CM523-7	1	6	2	9.647	7.30082	4.36158	8.63922	11.0557		2106	CM523-7	1	6	2	9.53999	9.7509	7.44206	7.96476	9.7509
2201	Irrigation	RY9	2	1	2	10.2209	10.2634	10.1324	11.8122	10.2799		2201	RY9	2	1	2	10.4049	10.8784	8.85267	7.91552	10.8784
2202	Irrigation	KU50	2	2	2	10.0548	9.31135	9.16963	14.9207	11.073		2202	KU50	2	2	2	10.1306	12.2593	8.9067	8.12164	9.25926
2203	Irrigation	CMR38-125-77	2	3	2	11.0062	6.94647	10.4071	11.7166	10.2413		2203	CMR38-125-77	2	3	2	10.0302	11.1955	9.89675	9.49637	10.1955
2204	Irrigation	CMR35-91-63	2	4	2	8.09754	9.3436	10.3434	10.7729	8.36327		2204	CMR35-91-63	2	4	2	10.6801	11.4742	10.2242	7.63945	9.47418
2205	Irrigation	RY72	2	5	2	11.1856	9.00532	10.8133	12.8729	9.81342		2205	RY72	2	5	2	10.334	11.9102	9.58999	10.2438	10.9102
2206	Irrigation	CM523-7	2	6	2	11.1111	8.59202	11.2195	12.0206	10.8559		2206	CM523-7	2	6	2	11.7064	11.5384	9.22861	8.83867	9.53837
3101	Rainfed	RY9	1	1	3	9.87555	8.12227	4.36279	11.3427	10.8843		3101	RY9	1	1	3	10.9451	10.2119	9.29979	7.45519	13.1145
3102	Rainfed	KU50	1	2	3	9.01501	5.74998	4.95932	7.33316	10.841		3102	KU50	1	2	3	9.91978	10.9938	7.62184	8.64975	10.9938
3103	Rainfed	CMR38-125-77	1	3	3	8.93026	5.46487	3.82275	5.4319	10.7905		3103	CMR38-125-77	1	3	3	9.91472	10.1901	7.9931	7.07586	10.1901
3104	Rainfed	CMR35-91-63	1	4	3	10.2778	6.54849	4.30807	11.8339	11.2102		3104	CMR35-91-63	1	4	3	9.12548	9.9634	7.94151	8.40639	9.9634
3105	Rainfed	RY72	1	5	3	11.6997	5.99657	4.01599	11.7889	10.7696		3105	RY72	1	5	3	9.39161	10.7221	7.6138	7.6571	10.7221
3106	Rainfed	CM523-7	1	6	3	11.1591	5.81878	3.60577	11.6142	10.5734		3106	CM523-7	1	6	3	9.80795	10.9655	8.05108	8.36007	10.9655
3201	Irrigation	RY9	2	1	3	6.21381	8.90873	10.2473	11.2092	10.3521		3201	RY9	2	1	3	11.7857	10.0265	9.96622	9.1107	10.0265
3202	Irrigation	KU50	2	2	3	8.72911	8.4392	9.73559	12.2044	10.3312		3202	KU50	2	2	3	10.6018	12.335	9.84092	10.564	10.335
3203	Irrigation	CMR38-125-77	2	3	3	10.2056	8.20806	8.21868	12.1895	10.6962		3203	CMR38-125-77	2	3	3	10.7206	10.3838	8.74449	11.1993	9.38384
3204	Irrigation	CMR35-91-63	2	4	3	12.4719	8.5006	10.261	11.1397	8.86816		3204	CMR35-91-63	2	4	3	10.3131	11.4733	8.64075	8.14005	9.47332
3205	Irrigation	RY72	2	5	3	10.434	8.71487	11.4973	11.5276	9.5513		3205	RY72	2	5	3	11.2293	10.9957	9.61795	9.31363	10.9957
3206	Irrigation	CM523-7	2	6	3	9.3667	8.95897	11.1352	9.77983	10.1843		3206	CM523-7	2	6	3	10.8276	11.4094	10.5273	9.1517	11.4094
4101	Rainfed	RY9	1	1	4	9.65876	4.33835	4.64026	13.8812	10.2363		4101	RY9	1	1	4	10.4818	9.82074	8.57114	6.84124	9.82074
4102	Rainfed	KU50	1	2	4	11.9709	5.37362	3.73781	12.8274	9.56001		4102	KU50	1	2	4	9.70197	10.6101	7.85762	8.85165	10.6101
4103	Rainfed	CMR38-125-77	1	3	4	8.6132	5.26918	4.2481	12.2659	9.01736		4103	CMR38-125-77	1	3	4	11.0367	9.96039	8.01833	10.5004	11.2908
4104	Rainfed	CMR35-91-63	1	4	4	11.4133	6.73248	3.65535	8.45856	10.0708		4104	CMR35-91-63	1	4	4	10.0553	9.98585	8.29706	8.0023	11.1199
4105	Rainfed	RY72	1	5	4	5.19321	6.93941	5.05723	8.68018	11.1445		4105	RY72	1	5	4	11.4514	10.8895	9.32468	9.18957	10.8895
4106	Rainfed	CM523-7	1	6	4	13.1013	5.59418	5.2873	7.67074	9.52212		4106	CM523-7	1	6	4	10.2894	10.9441	6.11396	6.74463	10.9441
4201	Irrigation	RY9	2	1	4	10.9523	8.11515	9.81558	7.12641	10.3231		4201	RY9	2	1	4	10.9372	10.3922	8.57373	8.90439	10.3922
4202	Irrigation	KU50	2	2	4	12.0841	8.40733	8.19489	8.88444	11.2913		4202	KU50	2	2	4	10.2201	12.1811	7.90196	8.00701	12.1811
4203	Irrigation	CMR38-125-77	2	3	4	13.3783	9.34635	11.0617	10.1838	12.0215		4203	CMR38-125-77	2	3	4	10.5137	12.0261	10.93	10.447	12.0261
4204	Irrigation	CMR35-91-63	2	4	4	10.6792	8.00862	11.0729	14.1287	9.72476		4204	CMR35-91-63	2	4	4	10.0309	11.1265	10.1698	10.5739	10.1265
4205	Irrigation	RY72	2	5	4	15.4115	8.75462	8.64546	14.2965	9.16047		4205	RY72	2	5	4	9.66669	11.0825	8.98321	10.7242	10.0825
4206	Irrigation	CM523-7	2	6	4	10.8776	8.86066	8.79326	11.5201	9.84639		4206	CM523-7	2	6	4	11.0735	11.101	9.87709	9.47029	11.101

## Sheet: 3 MAP_Year 1
Stem weight								Leaf weight									Tuber weight
Plot No	Var	Rep	Main P	Sub P	Fresh weight	Dry weight		Plot No	Water	Var	Rep	Main P	Sub P	Fresh weight	Dry weight		Plot No	Var	Rep	Main P	Sub P	Fresh weight	Dry weight
1101	RY9	1	1	1	57.61	3.22		1101	Rainfed	RY9	1	1	1	65.3	9.95406		1101	RY9	1	1	1	30	2.26
1102	KU50	1	1	2	140.69	31.32		1102	Rainfed	KU50	1	1	2	64.92	30.7147		1102	KU50	1	1	2	60	12.08
1103	CMR38-125-77	1	1	3	88.51	11.16		1103	Rainfed	CMR38-125-77	1	1	3	57.52	25.4172		1103	CMR38-125-77	1	1	3	30	0.67
1104	CMR35-91-63	1	1	5	104.51	16.04		1104	Rainfed	CMR35-91-63	1	1	5	61.97	16.75		1104	CMR35-91-63	1	1	5	60	5.89
1105	RY72	1	1	4	153.13	21.69		1105	Rainfed	RY72	1	1	4	75.37	14.4089		1105	RY72	1	1	4	130	24.06
1106	CM523-7	1	1	6	71.4	5.99		1106	Rainfed	CM523-7	1	1	6	92.8	9.9569		1106	CM523-7	1	1	6	40	6.46
1201	KU50	1	2	2	152.5	22.84		1201	Irrigation	KU50	1	2	2	67.2	14.1667		1201	KU50	1	2	2	220	12.84
1202	CMR38-125-77	1	2	3	230.94	38.5		1202	Irrigation	CMR38-125-77	1	2	3	80.18	13.6443		1202	CMR38-125-77	1	2	3	320	60.56
1203	CMR35-91-63	1	2	5	274.08	41.94		1203	Irrigation	CMR35-91-63	1	2	5	62.5	22.912		1203	CMR35-91-63	1	2	5	10	0.43
1204	RY9	1	2	1	217.01	28.03		1204	Irrigation	RY9	1	2	1	89.27	17.1838		1204	RY9	1	2	1	70	9.64
1205	RY72	1	2	4	142.43	20.12		1205	Irrigation	RY72	1	2	4	105	8.42857		1205	RY72	1	2	4	70	15
1206	CM523-7	1	2	6	284.12	52.31		1206	Irrigation	CM523-7	1	2	6	119.26	8.52759		1206	CM523-7	1	2	6	150	20
2101	RY9	2	1	1	172.84	23.33		2101	Rainfed	RY9	2	1	1	78.24	19.2996		2101	RY9	2	1	1	110	18.42
2102	RY72	2	1	4	125.83	18.18		2102	Rainfed	RY72	2	1	4	62.34	20.6769		2102	RY72	2	1	4	140	27.94
2103	CMR38-125-77	2	1	3	208.23	56.68		2103	Rainfed	CMR38-125-77	2	1	3	81.35	34.0504		2103	CMR38-125-77	2	1	3	380	69.8
2104	CM523-7	2	1	6	196.09	34.21		2104	Rainfed	CM523-7	2	1	6	70.32	32.9209		2104	CM523-7	2	1	6	170	24.19
2105	CMR35-91-63	2	1	5	147.33	22.45		2105	Rainfed	CMR35-91-63	2	1	5	70.5	33.1773		2105	CMR35-91-63	2	1	5	60	9.91
2106	KU50	2	1	2	167.87	28.22		2106	Rainfed	KU50	2	1	2	107.38	20.4321		2106	KU50	2	1	2	120	18.52
2201	RY72	2	2	4	123.43	14.62		2201	Irrigation	RY72	2	2	4	72.62	32.2363		2201	RY72	2	2	4	190	37.66
2202	RY9	2	2	1	148.06	19.89		2202	Irrigation	RY9	2	2	1	143.03	14.8081		2202	RY9	2	2	1	50	8.59
2203	CMR38-125-77	2	2	3	111.33	13.7		2203	Irrigation	CMR38-125-77	2	2	3	130.1	6.38739		2203	CMR38-125-77	2	2	3	160	32.01
2204	CMR35-91-63	2	2	5	129.04	20.03		2204	Irrigation	CMR35-91-63	2	2	5	54.55	29.9908		2204	CMR35-91-63	2	2	5	140	23.93
2205	KU50	2	2	2	178.57	30.48		2205	Irrigation	KU50	2	2	2	84.35	21.8969		2205	KU50	2	2	2	100	19.07
2206	CM523-7	2	2	6	143.24	19.49		2206	Irrigation	CM523-7	2	2	6	72.37	25.3434		2206	CM523-7	2	2	6	80	14.52
3101	CM523-7	3	1	6	166.32	25.18		3101	Rainfed	CM523-7	3	1	6	130.73	15.184		3101	CM523-7	3	1	6	530	80.62
3102	CMR35-91-63	3	1	5	112.16	16.95		3102	Rainfed	CMR35-91-63	3	1	5	110.11	26.4463		3102	CMR35-91-63	3	1	5	250	44.79
3103	RY9	3	1	1	126.87	17.7		3103	Rainfed	RY9	3	1	1	81.54	14.9129		3103	RY9	3	1	1	130	17.78
3104	KU50	3	1	2	237.36	41.88		3104	Rainfed	KU50	3	1	2	139.41	19.9125		3104	KU50	3	1	2	490	95.39
3105	CMR38-125-77	3	1	3	286.88	53.85		3105	Rainfed	CMR38-125-77	3	1	3	238.42	12.9813		3105	CMR38-125-77	3	1	3	570	43.88
3106	RY72	3	1	4	230.31	38.83		3106	Rainfed	RY72	3	1	4	189.17	21.1027		3106	RY72	3	1	4	900	162.33
3201	KU50	3	2	2	168.34	25.61		3201	Irrigation	KU50	3	2	2	149.49	16.8239		3201	KU50	3	2	2	530	105.02
3202	RY9	3	2	1	190.88	29.09		3202	Irrigation	RY9	3	2	1	177.36	9.53992		3202	RY9	3	2	1	130	26.51
3203	CM523-7	3	2	6	261.33	37.56		3203	Irrigation	CM523-7	3	2	6	117.58	31.4679		3203	CM523-7	3	2	6	890	97.51
3204	RY72	3	2	5	96.79	9.48		3204	Irrigation	RY72	3	2	5	56.12	18.2466		3204	RY72	3	2	5	390	63.34
3205	CMR38-125-77	3	2	3	171.22	26.24		3205	Irrigation	CMR38-125-77	3	2	3	101.09	22.8509		3205	CMR38-125-77	3	2	3	490	89.5
3206	CMR35-91-63	3	2	4	200.11	34.74		3206	Irrigation	CMR35-91-63	3	2	4	137.32	11.0618		3206	CMR35-91-63	3	2	4	220	40.95
4101	CMR38-125-77	4	1	3	491.45	97.81		4101	Rainfed	CMR38-125-77	4	1	3	149.08	26.7843		4101	CMR38-125-77	4	1	3	630	134.3
4102	RY9	4	1	1	363.49	60.29		4102	Rainfed	RY9	4	1	1	148.81	10.3084		4102	RY9	4	1	1	210	43.55
4103	CMR35-91-63	4	1	5	168.35	28.3		4103	Rainfed	CMR35-91-63	4	1	5	133.14	20.4972		4103	CMR35-91-63	4	1	5	290	39.87
4104	RY72	4	1	4	167.83	22.81		4104	Rainfed	RY72	4	1	4	300.44	4.70976		4104	RY72	4	1	4	240	48.29
4105	CM523-7	4	1	6	172.54	28.41		4105	Rainfed	CM523-7	4	1	6	122.04	12.9548		4105	CM523-7	4	1	6	160	27.04
4106	KU50	4	1	2	179.72	33.92		4106	Rainfed	KU50	4	1	2	182.3	9.68184		4106	KU50	4	1	2	290	53.24
4201	RY72	4	2	4	180.98	28.58		4201	Irrigation	RY72	4	2	4	180.07	12.1897		4201	RY72	4	2	4	550	111.51
4202	CMR35-91-63	4	2	5	182.39	31.9		4202	Irrigation	CMR35-91-63	4	2	5	118.2	30.0085		4202	CMR35-91-63	4	2	5	240	42.16
4203	KU50	4	2	2	328.56	54.62		4203	Irrigation	KU50	4	2	2	204.55	16.2747		4203	KU50	4	2	2	650	141.12
4204	RY9	4	2	1	143.01	16.36		4204	Irrigation	RY9	4	2	1	89.94	16.9113		4204	RY9	4	2	1	320	58.88
4205	CM523-7	4	2	6	221.32	27.91		4205	Irrigation	CM523-7	4	2	6	87.39	8.75386		4205	CM523-7	4	2	6	110	17.82
4206	CMR38-125-77	4	2	3	278.53	46.66		4206	Irrigation	CMR38-125-77	4	2	3	147.8	19.6211		4206	CMR38-125-77	4	2	3	610	130.68

## Sheet: 5 MAP_Year 1
Stem weight									Leaf weight								Tuber weight
Plot No	Water	Var	Rep	Main P	Sub P	Fresh weight	Dry weight		Plot No	Var	Rep	Main P	Sub P	Fresh weight	Dry weight		Plot No	Var	Rep	Main P	Sub P	Fresh weight	Dry weight
1101	Rainfed	RY9	1	1	1	127.82	18.8908		1101	RY9	1	1	1	24	9.38		1101	RY9	1	1	1	890	312.302
1102	Rainfed	KU50	1	1	2	500.73	85.6786		1102	KU50	1	1	2	397.72	17.17		1102	KU50	1	1	2	1210	358.784
1103	Rainfed	CMR38-125-77	1	1	3	670.1	112.532		1103	CMR38-125-77	1	1	3	40.19	7.51		1103	CMR38-125-77	1	1	3	2470	736.15
1104	Rainfed	CMR35-91-63	1	1	5	325.78	56.36		1104	CMR35-91-63	1	1	5	203.75	13.28		1104	CMR35-91-63	1	1	5	1780	428.048
1105	Rainfed	RY72	1	1	4	351.1	55.438		1105	RY72	1	1	4	128.46	13.56		1105	RY72	1	1	4	1590	577.692
1106	Rainfed	CM523-7	1	1	6	512.28	96.96		1106	CM523-7	1	1	6	285.38	17.87		1106	CM523-7	1	1	6	610	236.748
1201	Irrigation	KU50	1	2	2	558.2	77.88		1201	KU50	1	2	2	625.73	12.9		1201	KU50	1	2	2	430	99.1832
1202	Irrigation	CMR38-125-77	1	2	3	1101.76	206.9		1202	CMR38-125-77	1	2	3	629.15	33.78		1202	CMR38-125-77	1	2	3	1970	808.065
1203	Irrigation	CMR35-91-63	1	2	5	648.88	313.32		1203	CMR35-91-63	1	2	5	472.78	18.32		1203	CMR35-91-63	1	2	5	1240	461.629
1204	Irrigation	RY9	1	2	1	415.14	76.48		1204	RY9	1	2	1	238.99	17.17		1204	RY9	1	2	1	740	166.056
1205	Irrigation	RY72	1	2	4	291.82	54.8		1205	RY72	1	2	4	435.82	22.87		1205	RY72	1	2	4	640	382.001
1206	Irrigation	CM523-7	1	2	6	1055.96	155.42		1206	CM523-7	1	2	6	421.24	22.11		1206	CM523-7	1	2	6	480	56
2101	Rainfed	RY9	2	1	1	1193.7	70.94		2101	RY9	2	1	1	326.54	12.58		2101	RY9	2	1	1	450	19.1487
2102	Rainfed	RY72	2	1	4	413.62	34.72		2102	RY72	2	1	4	418.96	16.98		2102	RY72	2	1	4	420	126.61
2103	Rainfed	CMR38-125-77	2	1	3	484.16	81.3		2103	CMR38-125-77	2	1	3	180.03	17.1		2103	CMR38-125-77	2	1	3	1320	584.481
2104	Rainfed	CM523-7	2	1	6	962.32	94.52		2104	CM523-7	2	1	6	160.42	11.07		2104	CM523-7	2	1	6	830	213.508
2105	Rainfed	CMR35-91-63	2	1	5	938	98.98		2105	CMR35-91-63	2	1	5	251.04	25.53		2105	CMR35-91-63	2	1	5	550	129.214
2106	Rainfed	KU50	2	1	2	1482.3	139.08		2106	KU50	2	1	2	670.18	36.15		2106	KU50	2	1	2	700	207.319
2201	Irrigation	RY72	2	2	4	845.12	109.1		2201	RY72	2	2	4	189.12	23.32		2201	RY72	2	2	4	910	262.844
2202	Irrigation	RY9	2	2	1	424.6	84.38		2202	RY9	2	2	1	198.16	18.53		2202	RY9	2	2	1	1560	779.657
2203	Irrigation	CMR38-125-77	2	2	3	541.86	114		2203	CMR38-125-77	2	2	3	111.13	15.38		2203	CMR38-125-77	2	2	3	1560	767.859
2204	Irrigation	CMR35-91-63	2	2	5	601.76	47.46		2204	CMR35-91-63	2	2	5	129.76	18.58		2204	CMR35-91-63	2	2	5	1150	447.632
2205	Irrigation	KU50	2	2	2	654.76	73.5		2205	KU50	2	2	2	251.12	29.89		2205	KU50	2	2	2	1190	342.653
2206	Irrigation	CM523-7	2	2	6	513.54	61.38		2206	CM523-7	2	2	6	150.72	25.41		2206	CM523-7	2	2	6	1460	537.28
3101	Rainfed	CM523-7	3	1	6	988.14	193.6		3101	CM523-7	3	1	6	224.31	20.81		3101	CM523-7	3	1	6	740	144.365
3102	Rainfed	CMR35-91-63	3	1	5	1050.58	161.74		3102	CMR35-91-63	3	1	5	267.66	15.96		3102	CMR35-91-63	3	1	5	1030	206.698
3103	Rainfed	RY9	3	1	1	746.26	109.3		3103	RY9	3	1	1	273.95	18.28		3103	RY9	3	1	1	540	176.639
3104	Rainfed	KU50	3	1	2	796.6	140.16		3104	KU50	3	1	2	101.1	16.1		3104	KU50	3	1	2	980	258.662
3105	Rainfed	CMR38-125-77	3	1	3	956.68	153.64		3105	CMR38-125-77	3	1	3	150.75	17.65		3105	CMR38-125-77	3	1	3	1020	510.124
3106	Rainfed	RY72	3	1	4	510.8	79.02		3106	RY72	3	1	4	114.47	15.13		3106	RY72	3	1	4	1440	468.525
3201	Irrigation	KU50	3	2	2	890.42	164.78		3201	KU50	3	2	2	277.42	21.64		3201	KU50	3	2	2	840	299.437
3202	Irrigation	RY9	3	2	1	1145.32	177.78		3202	RY9	3	2	1	157.36	17.79		3202	RY9	3	2	1	430	297.662
3203	Irrigation	CM523-7	3	2	6	646.14	101.02		3203	CM523-7	3	2	6	148	14.87		3203	CM523-7	3	2	6	470	212.66
3204	Irrigation	RY72	3	2	5	302.66	42.04		3204	RY72	3	2	5	135.48	11.96		3204	RY72	3	2	5	620	292.209
3205	Irrigation	CMR38-125-77	3	2	3	658.16	114.52		3205	CMR38-125-77	3	2	3	377.39	31.01		3205	CMR38-125-77	3	2	3	1370	635.368
3206	Irrigation	CMR35-91-63	3	2	4	1002.56	186.5		3206	CMR35-91-63	3	2	4	241.55	27.57		3206	CMR35-91-63	3	2	4	1400	463.043
4101	Rainfed	CMR38-125-77	4	1	3	641.34	106		4101	CMR38-125-77	4	1	3	103.9	17		4101	CMR38-125-77	4	1	3	1090	504.754
4102	Rainfed	RY9	4	1	1	894.6	155.98		4102	RY9	4	1	1	221.62	14.56		4102	RY9	4	1	1	1770	564.752
4103	Rainfed	CMR35-91-63	4	1	5	770.34	142.38		4103	CMR35-91-63	4	1	5	194.29	10.83		4103	CMR35-91-63	4	1	5	830	224.977
4104	Rainfed	RY72	4	1	4	646.34	69.62		4104	RY72	4	1	4	140.54	12.79		4104	RY72	4	1	4	2610	741.335
4105	Rainfed	CM523-7	4	1	6	759.22	134.96		4105	CM523-7	4	1	6	236.17	28.26		4105	CM523-7	4	1	6	980	260.69
4106	Rainfed	KU50	4	1	2	281.66	47.6		4106	KU50	4	1	2	127.98	14.37		4106	KU50	4	1	2	1540	490.924
4201	Irrigation	RY72	4	2	4	346.58	49.12		4201	RY72	4	2	4	251.48	20.41		4201	RY72	4	2	4	1040	357.32
4202	Irrigation	CMR35-91-63	4	2	5	1040.66	164.46		4202	CMR35-91-63	4	2	5	207.48	14.75		4202	CMR35-91-63	4	2	5	270	243.043
4203	Irrigation	KU50	4	2	2	887.44	153.94		4203	KU50	4	2	2	205.64	13.64		4203	KU50	4	2	2	1350	699.201
4204	Irrigation	RY9	4	2	1	1841.24	263.048		4204	RY9	4	2	1	213.77	21.75		4204	RY9	4	2	1	870	401.696
4205	Irrigation	CM523-7	4	2	6	1578.96	229.964		4205	CM523-7	4	2	6	131.44	16.97		4205	CM523-7	4	2	6	1450	538.593
4206	Irrigation	CMR38-125-77	4	2	3	737.1	135.3		4206	CMR38-125-77	4	2	3	244.34	25.63		4206	CMR38-125-77	4	2	3	1850	642.14

## Sheet: 6 MAP_Year 1
Stem weight									Leaf weight								Tuber weight
Plot No	Water	Var	Rep	Main P	Sub P	Fresh weight	Dry weight		Plot No	Var	Rep	Main P	Sub P	Fresh weight	Dry weight		Plot No	Var	Rep	Main P	Sub P	Fresh weight	Dry weight
1101	Rainfed	RY9	1	1	1	340	61.14		1101	RY9	1	1	1	71.52	27.98		1101	RY9	1	1	1	2030	563.074
1102	Rainfed	KU50	1	1	2	810	224.26		1102	KU50	1	1	2	485.74	20.97		1102	KU50	1	1	2	3195	1112.53
1103	Rainfed	CMR38-125-77	1	1	3	1020	284		1103	CMR38-125-77	1	1	3	150.93	28.2		1103	CMR38-125-77	1	1	3	1610	555.512
1104	Rainfed	CMR35-91-63	1	1	5	570	155.36		1104	CMR35-91-63	1	1	5	260.82	17		1104	CMR35-91-63	1	1	5	2560	572.441
1105	Rainfed	RY72	1	1	4	880	194.363		1105	RY72	1	1	4	182.65	19.28		1105	RY72	1	1	4	2530	857.097
1106	Rainfed	CM523-7	1	1	6	740	237.02		1106	CM523-7	1	1	6	416.33	26.07		1106	CM523-7	1	1	6	810	161.943
1201	Irrigation	KU50	1	2	2	1100	231.34		1201	KU50	1	2	2	762.52	22.6577		1201	KU50	1	2	2	2430	896.877
1202	Irrigation	CMR38-125-77	1	2	3	1460	481.06		1202	CMR38-125-77	1	2	3	267.64	14.37		1202	CMR38-125-77	1	2	3	3875	1625.53
1203	Irrigation	CMR35-91-63	1	2	5	1060	825.16		1203	CMR35-91-63	1	2	5	554.07	42.7341		1203	CMR35-91-63	1	2	5	3230	1136.09
1204	Irrigation	RY9	1	2	1	920	245.96		1204	RY9	1	2	1	389.73	28		1204	RY9	1	2	1	2945	922.467
1205	Irrigation	RY72	1	2	4	650	177.734		1205	RY72	1	2	4	299.76	15.73		1205	RY72	1	2	4	1495	713.801
1206	Irrigation	CM523-7	1	2	6	1890	476.74		1206	CM523-7	1	2	6	246.15	12.92		1206	CM523-7	1	2	6	2870	537.244
2101	Rainfed	RY9	2	1	1	1610	167.158		2101	RY9	2	1	1	330.76	11.48		2101	RY9	2	1	1	2115	224.395
2102	Rainfed	RY72	2	1	4	750	95.5125		2102	RY72	2	1	4	302.02	12.24		2102	RY72	2	1	4	1680	788.506
2103	Rainfed	CMR38-125-77	2	1	3	810	208.818		2103	CMR38-125-77	2	1	3	165.19	15.69		2103	CMR38-125-77	2	1	3	1180	498.739
2104	Rainfed	CM523-7	2	1	6	1500	241.84		2104	CM523-7	2	1	6	295.91	40.243		2104	CM523-7	2	1	6	2985	907.901
2105	Rainfed	CMR35-91-63	2	1	5	1440	262.98		2105	CMR35-91-63	2	1	5	282.12	28.65		2105	CMR35-91-63	2	1	5	2125	568.438
2106	Rainfed	KU50	2	1	2	1900	324.855		2106	KU50	2	1	2	391.54	42.5049		2106	KU50	2	1	2	3055	1296
2201	Irrigation	RY72	2	2	4	1350	284.185		2201	RY72	2	2	4	338.12	39.75		2201	RY72	2	2	4	3225	1192.89
2202	Irrigation	RY9	2	2	1	780	211.142		2202	RY9	2	2	1	306.66	28.6		2202	RY9	2	2	1	3135	1472.95
2203	Irrigation	CMR38-125-77	2	2	3	1400	445.094		2203	CMR38-125-77	2	2	3	455.6	6.93		2203	CMR38-125-77	2	2	3	4640	2198.59
2204	Irrigation	CMR35-91-63	2	2	5	770	92.2274		2204	CMR35-91-63	2	2	5	110.16	15.77		2204	CMR35-91-63	2	2	5	1680	697.667
2205	Irrigation	KU50	2	2	2	910	169.023		2205	KU50	2	2	2	337.05	18.28		2205	KU50	2	2	2	3720	1300.54
2206	Irrigation	CM523-7	2	2	6	940	173.72		2206	CM523-7	2	2	6	141.35	44.0483		2206	CM523-7	2	2	6	1520	333.341
3101	Rainfed	CM523-7	3	1	6	1540	563.262		3101	CM523-7	3	1	6	347.41	32.23		3101	CM523-7	3	1	6	3645	1026.67
3102	Rainfed	CMR35-91-63	3	1	5	1430	380.777		3102	CMR35-91-63	3	1	5	619.17	44.0712		3102	CMR35-91-63	3	1	5	3970	1098.66
3103	Rainfed	RY9	3	1	1	1370	310.748		3103	RY9	3	1	1	305.72	37.5523		3103	RY9	3	1	1	1060	387.267
3104	Rainfed	KU50	3	1	2	1230	360.062		3104	KU50	3	1	2	238.63	38		3104	KU50	3	1	2	2815	861.613
3105	Rainfed	CMR38-125-77	3	1	3	1540	400.94		3105	CMR38-125-77	3	1	3	335.24	39.25		3105	CMR38-125-77	3	1	3	3825	1681.63
3106	Rainfed	RY72	3	1	4	960	229.54		3106	RY72	3	1	4	438.72	57.99		3106	RY72	3	1	4	3240	1408.75
3201	Irrigation	KU50	3	2	2	1540	463.82		3201	KU50	3	2	2	718.73	53.0224		3201	KU50	3	2	2	3165	1398.15
3202	Irrigation	RY9	3	2	1	2110	668.448		3202	RY9	3	2	1	775.73	33.1843		3202	RY9	3	2	1	2220	995.755
3203	Irrigation	CM523-7	3	2	6	1220	291.74		3203	CM523-7	3	2	6	607.71	70.3526		3203	CM523-7	3	2	6	2130	1098.81
3204	Irrigation	RY72	3	2	5	760	147.6		3204	RY72	3	2	5	501.88	25.49		3204	RY72	3	2	5	3330	1120.35
3205	Irrigation	CMR38-125-77	3	2	3	1300	341.02		3205	CMR38-125-77	3	2	3	444.57	36.53		3205	CMR38-125-77	3	2	3	4510	2234.34
3206	Irrigation	CMR35-91-63	3	2	4	1400	446.92		3206	CMR35-91-63	3	2	4	740.06	27.9699		3206	CMR35-91-63	3	2	4	2470	862.361
4101	Rainfed	CMR38-125-77	4	1	3	1260	314.46		4101	CMR38-125-77	4	1	3	297.9	48.74		4101	CMR38-125-77	4	1	3	4505	2613.01
4102	Rainfed	RY9	4	1	1	1250	376.25		4102	RY9	4	1	1	349.63	22.97		4102	RY9	4	1	1	4135	1359.05
4103	Rainfed	CMR35-91-63	4	1	5	1310	385.583		4103	CMR35-91-63	4	1	5	705.58	50.5307		4103	CMR35-91-63	4	1	5	2510	778.741
4104	Rainfed	RY72	4	1	4	1360	216.14		4104	RY72	4	1	4	305.58	27.81		4104	RY72	4	1	4	4965	1795.16
4105	Rainfed	CM523-7	4	1	6	1360	338		4105	CM523-7	4	1	6	293.23	24.65		4105	CM523-7	4	1	6	2595	783.273
4106	Rainfed	KU50	4	1	2	500	109.281		4106	KU50	4	1	2	526.55	23.07		4106	KU50	4	1	2	2145	944.431
4201	Irrigation	RY72	4	2	4	1210	217.204		4201	RY72	4	2	4	426.08	34.58		4201	RY72	4	2	4	3315	878.02
4202	Irrigation	CMR35-91-63	4	2	5	2370	659.522		4202	CMR35-91-63	4	2	5	1000.94	90.7606		4202	CMR35-91-63	4	2	5	1930	1143.64
4203	Irrigation	KU50	4	2	2	1370	392.706		4203	KU50	4	2	2	741.31	64.2895		4203	KU50	4	2	2	3990	2416.82
4204	Irrigation	RY9	4	2	1	1830	527.522		4204	RY9	4	2	1	576.04	30.28		4204	RY9	4	2	1	3175	1788.94
4205	Irrigation	CM523-7	4	2	6	1120	423.662		4205	CM523-7	4	2	6	727.57	19.2075		4205	CM523-7	4	2	6	2960	1497.21
4206	Irrigation	CMR38-125-77	4	2	3	1440	399.62		4206	CMR38-125-77	4	2	3	399.25	41.88		4206	CMR38-125-77	4	2	3	3885	1976.02

## Sheet: 12 MAP_Year 1
2 plants
Stem weight									Leaf weight								Tuber weight
Plot No	Water	Var	Rep	Main P	Sub P	Fresh weight	Dry weight		Plot No	Var	Rep	Main P	Sub P	Fresh weight	Dry weight		Plot No	Var	Rep	Main P	Sub P	Fresh weight	Dry weight
1101	Rainfed	RY9	1	1	1	270	71.6538		1101	RY9	1	1	1	575	119.496		1101	RY9	1	1	1	4861.25	1920.54
1102	Rainfed	KU50	1	1	2	1420	352.397		1102	KU50	1	1	2	965	188.18		1102	KU50	1	1	2	5026.25	2007.88
1103	Rainfed	CMR38-125-77	1	1	3	960	258.391		1103	CMR38-125-77	1	1	3	500	117.517		1103	CMR38-125-77	1	1	3	6218.75	2409.56
1104	Rainfed	CMR35-91-63	1	1	5	1360	360.679		1104	CMR35-91-63	1	1	5	250	62.6298		1104	CMR35-91-63	1	1	5	1572.5	571.14
1105	Rainfed	RY72	1	1	4	1480	346.278		1105	RY72	1	1	4	515	112.088		1105	RY72	1	1	4	4848.75	1842.39
1106	Rainfed	CM523-7	1	1	6	2670	615.873		1106	CM523-7	1	1	6	715	143.553		1106	CM523-7	1	1	6	5641.25	1718.97
1201	Irrigation	KU50	1	2	2	910	225.881		1201	KU50	1	2	2	375	54.2276		1201	KU50	1	2	2	3925	1451.93
1202	Irrigation	CMR38-125-77	1	2	3	340	91.5531		1202	CMR38-125-77	1	2	3	227.5	83.8288		1202	CMR38-125-77	1	2	3	4323.75	1642.72
1203	Irrigation	CMR35-91-63	1	2	5	2230	591.426		1203	CMR35-91-63	1	2	5	500	35.4817		1203	CMR35-91-63	1	2	5	4195	1592.4
1204	Irrigation	RY9	1	2	1	810	214.966		1204	RY9	1	2	1	317.5	77.7462		1204	RY9	1	2	1	3090	1203.42
1205	Irrigation	RY72	1	2	4	920	220.835		1205	RY72	1	2	4	250	121.365		1205	RY72	1	2	4	5350	1925.44
1206	Irrigation	CM523-7	1	2	6	940	216.827		1206	CM523-7	1	2	6	482.5	126.215		1206	CM523-7	1	2	6	5610	1516.44
2101	Rainfed	RY9	2	1	1	800	173.088		2101	RY9	2	1	1	727.5	94.6002		2101	RY9	2	1	1	6537.5	2449.7
2102	Rainfed	RY72	2	1	4	600	140.376		2102	RY72	2	1	4	795	59.3433		2102	RY72	2	1	4	6058.75	2303.22
2103	Rainfed	CMR38-125-77	2	1	3	1610	337.115		2103	CMR38-125-77	2	1	3	692.5	130.23		2103	CMR38-125-77	2	1	3	5941.25	2333.59
2104	Rainfed	CM523-7	2	1	6	1640	378.298		2104	CM523-7	2	1	6	570	75.5081		2104	CM523-7	2	1	6	5033.75	1777.39
2105	Rainfed	CMR35-91-63	2	1	5	950	251.956		2105	CMR35-91-63	2	1	5	487.5	61.6007		2105	CMR35-91-63	2	1	5	5203.75	1990.53
2106	Rainfed	KU50	2	1	2	1970	534.763		2106	KU50	2	1	2	365	108.437		2106	KU50	2	1	2	4141.25	1686.52
2201	Irrigation	RY72	2	2	4	1500	367.057		2201	RY72	2	2	4	262.5	138.214		2201	RY72	2	2	4	2708.75	927.101
2202	Irrigation	RY9	2	2	1	2090	592.294		2202	RY9	2	2	1	330	144.584		2202	RY9	2	2	1	3567.5	1224.95
2203	Irrigation	CMR38-125-77	2	2	3	420	121.485		2203	CMR38-125-77	2	2	3	157.5	129.511		2203	CMR38-125-77	2	2	3	1093.75	385.584
2204	Irrigation	CMR35-91-63	2	2	5	850	223.839		2204	CMR35-91-63	2	2	5	330	126.894		2204	CMR35-91-63	2	2	5	812.5	285.881
2205	Irrigation	KU50	2	2	2	2660	677.407		2205	KU50	2	2	2	602.5	117.543		2205	KU50	2	2	2	4725	1689.64
2206	Irrigation	CM523-7	2	2	6	590	127.644		2206	CM523-7	2	2	6	602.5	87.1012		2206	CM523-7	2	2	6	6233.75	1743.75
3101	Rainfed	CM523-7	3	1	6	1240	268.274		3101	CM523-7	3	1	6	700	142.173		3101	CM523-7	3	1	6	9488.75	2758.55
3102	Rainfed	CMR35-91-63	3	1	5	1220	331.848		3102	CMR35-91-63	3	1	5	602.5	132.445		3102	CMR35-91-63	3	1	5	5226.25	1784.29
3103	Rainfed	RY9	3	1	1	1160	244.841		3103	RY9	3	1	1	847.5	371.314		3103	RY9	3	1	1	5500	2070.25
3104	Rainfed	KU50	3	1	2	1350	366.466		3104	KU50	3	1	2	905	172.639		3104	KU50	3	1	2	6737.5	2602.25
3105	Rainfed	CMR38-125-77	3	1	3	2020	544.65		3105	CMR38-125-77	3	1	3	422.5	96.1243		3105	CMR38-125-77	3	1	3	3563.5	1347.03
3106	Rainfed	RY72	3	1	4	950	201.477		3106	RY72	3	1	4	787.5	154.67		3106	RY72	3	1	4	5817.5	2054.45
3201	Irrigation	KU50	3	2	2	2600	662.127		3201	KU50	3	2	2	937.5	181.801		3201	KU50	3	2	2	5122.86	1637.26
3202	Irrigation	RY9	3	2	1	2670	661.935		3202	RY9	3	2	1	592.5	116.162		3202	RY9	3	2	1	4787.5	1526.84
3203	Irrigation	CM523-7	3	2	6	4270	924.189		3203	CM523-7	3	2	6	485	94.8945		3203	CM523-7	3	2	6	465	108.142
3204	Irrigation	RY72	3	2	5	1520	322.357		3204	RY72	3	2	5	142.5	32.3258		3204	RY72	3	2	5	all rotten
3205	Irrigation	CMR38-125-77	3	2	3	1010	320.116		3205	CMR38-125-77	3	2	3	177.5	44.6128		3205	CMR38-125-77	3	2	3	4267.5	1400.93
3206	Irrigation	CMR35-91-63	3	2	4	3070	784.509		3206	CMR35-91-63	3	2	4	627.5	201.407		3206	CMR35-91-63	3	2	4	6352.5	2447.03
4101	Rainfed	CMR38-125-77	4	1	3	2140	576.898		4101	CMR38-125-77	4	1	3	355	83.5367		4101	CMR38-125-77	4	1	3	5545	2023.47
4102	Rainfed	RY9	4	1	1	2090	518.147		4102	RY9	4	1	1	595	126.987		4102	RY9	4	1	1	4648.75	1698.83
4103	Rainfed	CMR35-91-63	4	1	5	2950	753.889		4103	CMR35-91-63	4	1	5	587.5	129.523		4103	CMR35-91-63	4	1	5	4788.75	1572.2
4104	Rainfed	RY72	4	1	4	1180	250.226		4104	RY72	4	1	4	315	76.1981		4104	RY72	4	1	4	1188.75	303.947
4105	Rainfed	CM523-7	4	1	6	2520	545.424		4105	CM523-7	4	1	6	350	76.7796		4105	CM523-7	4	1	6	1156.25	245.167
4106	Rainfed	KU50	4	1	2	1620	425.606		4106	KU50	4	1	2	230	53.6931		4106	KU50	4	1	2	830	279.982
4201	Irrigation	RY72	4	2	4	1520	322.353		4201	RY72	4	2	4	307.5	76.5548		4201	RY72	4	2	4	906.25	288.49
4202	Irrigation	CMR35-91-63	4	2	5	1560	398.692		4202	CMR35-91-63	4	2	5	140	36.4149		4202	CMR35-91-63	4	2	5	960	272.955
4203	Irrigation	KU50	4	2	2	1070	281.11		4203	KU50	4	2	2	472.5	102.76		4203	KU50	4	2	2	1530	504.623
4204	Irrigation	RY9	4	2	1	1120	236.398		4204	RY9	4	2	1	262.5	57.3611		4204	RY9	4	2	1	1860	620.597
4205	Irrigation	CM523-7	4	2	6	4900	1060.57		4205	CM523-7	4	2	6	392.5	86.239		4205	CM523-7	4	2	6	800	184.076
4206	Irrigation	CMR38-125-77	4	2	3	640	202.845		4206	CMR38-125-77	4	2	3	92.5	125.818		4206	CMR38-125-77	4	2	3	all rotten
10 plants
Stem weight									Leaf weight								Tuber weight								น้ำหนักเหง้า								น้ำหนักก้าน								น้ำหนักราก								Biological HI
Plot No	Water	Var	Rep	Main P	Sub P	Fresh weight	Dry weight		Plot No	Var	Rep	Main P	Sub P	Fresh weight	Dry weight		Plot No	Var	Rep	Main P	Sub P	Fresh weight	Dry weight		Plot No	Var	Rep	Main P	Sub P	Fresh weight	Dry weight		Plot No	Var	Rep	Main P	Sub P	Fresh weight	Dry weight		Plot No	Var	Rep	Main P	Sub P	Fresh weight	Dry weight		Plot No
1101	Rainfed	RY9	1	1	1	8000	1882.46		1101	RY9	1	1	1	2300	477.984		1101	RY9	1	1	1	31500	12417.2		1101	RY9	1	1	1	3240	1186.86		1101	RY9	1	1	1	1450	254.113		1101	RY9	1	1	1	144.36	52.99		1101
1102	Rainfed	KU50	1	1	2	14400	3965.87		1102	KU50	1	1	2	3860	752.72		1102	KU50	1	1	2	36610	14691.6		1102	KU50	1	1	2	3100	1213.32		1102	KU50	1	1	2	1540	278.52		1102	KU50	1	1	2	40.8	15.32		1102
1103	Rainfed	CMR38-125-77	1	1	3	15000	4660.98		1103	CMR38-125-77	1	1	3	2000	470.069		1103	CMR38-125-77	1	1	3	44120	17358.2		1103	CMR38-125-77	1	1	3	4250	1669.23		1103	CMR38-125-77	1	1	3	850	161.946		1103	CMR38-125-77	1	1	3	63.56	23.38		1103
1104	Rainfed	CMR35-91-63	1	1	5	7600	2285.63		1104	CMR35-91-63	1	1	5	1000	250.519		1104	CMR35-91-63	1	1	5	9290	3250.15		1104	CMR35-91-63	1	1	5	3040	1166.04		1104	CMR35-91-63	1	1	5	360	77.4183		1104	CMR35-91-63	1	1	5	56.09	19.84		1104
1105	Rainfed	RY72	1	1	4	9200	2352.49		1105	RY72	1	1	4	2060	448.352		1105	RY72	1	1	4	33710	13294		1105	RY72	1	1	4	2310	944.292		1105	RY72	1	1	4	750	139.994		1105	RY72	1	1	4	26.48	9		1105
1106	Rainfed	CM523-7	1	1	6	13400	3314.6		1106	CM523-7	1	1	6	2860	574.211		1106	CM523-7	1	1	6	32250	10307.9		1106	CM523-7	1	1	6	2600	1016.91		1106	CM523-7	1	1	6	1340	932.058		1106	CM523-7	1	1	6	19.98	8.18		1106
1201	Irrigation	KU50	1	2	2	7600	2526.93		1201	KU50	1	2	2	1500	216.91		1201	KU50	1	2	2	28050	9943.61		1201	KU50	1	2	2	2520	1037.81		1201	KU50	1	2	2	480	104.603		1201	KU50	1	2	2	5.56	2.74		1201
1202	Irrigation	CMR38-125-77	1	2	3	6400	1541.45		1202	CMR38-125-77	1	2	3	910	335.315		1202	CMR38-125-77	1	2	3	30040	12217.5		1202	CMR38-125-77	1	2	3	2350	945.597		1202	CMR38-125-77	1	2	3	260	53.2179		1202	CMR38-125-77	1	2	3	17.28	7.54		1202
1203	Irrigation	CMR35-91-63	1	2	5	10000	2775.88		1203	CMR35-91-63	1	2	5	2520	178.828		1203	CMR35-91-63	1	2	5	27410	9921.61		1203	CMR35-91-63	1	2	5	3430	1437.56		1203	CMR35-91-63	1	2	5	840	162.356		1203	CMR35-91-63	1	2	5	57.88	22.7		1203
1204	Irrigation	RY9	1	2	1	5000	1564.9		1204	RY9	1	2	1	1270	310.985		1204	RY9	1	2	1	19560	7618.37		1204	RY9	1	2	1	2750	986.783		1204	RY9	1	2	1	780	134.047		1204	RY9	1	2	1	23.9	9.87		1204
1205	Irrigation	RY72	1	2	4	5400	1419.78		1205	RY72	1	2	4	1000	485.459		1205	RY72	1	2	4	24880	9611.05		1205	RY72	1	2	4	1710	692.483		1205	RY72	1	2	4	360	66.155		1205	RY72	1	2	4	15.73	6.76		1205
1206	Irrigation	CM523-7	1	2	6	13600	4420.26		1206	CM523-7	1	2	6	1930	504.861		1206	CM523-7	1	2	6	33610	8841.31		1206	CM523-7	1	2	6	2650	966.824		1206	CM523-7	1	2	6	780	152.515		1206	CM523-7	1	2	6	19.28	3.2		1206
2101	Rainfed	RY9	2	1	1	13000	3037.15		2101	RY9	2	1	1	2910	378.401		2101	RY9	2	1	1	43020	17092.2		2101	RY9	2	1	1	2710	920.889		2101	RY9	2	1	1	1680	284.496		2101	RY9	2	1	1	89.17	25.93		2101
2102	Rainfed	RY72	2	1	4	13800	3516.66		2102	RY72	2	1	4	3180	237.373		2102	RY72	2	1	4	43470	16007.8		2102	RY72	2	1	4	2100	759.459		2102	RY72	2	1	4	1260	183.74		2102	RY72	2	1	4	35.14	9.7		2102
2103	Rainfed	CMR38-125-77	2	1	3	14600	3854.4		2103	CMR38-125-77	2	1	3	2770	520.92		2103	CMR38-125-77	2	1	3	43620	16789		2103	CMR38-125-77	2	1	3	2810	1045.68		2103	CMR38-125-77	2	1	3	910	158.816		2103	CMR38-125-77	2	1	3	33.09	10		2103
2104	Rainfed	CM523-7	2	1	6	12000	2962.04		2104	CM523-7	2	1	6	2280	302.032		2104	CM523-7	2	1	6	36200	12067		2104	CM523-7	2	1	6	2870	1035.37		2104	CM523-7	2	1	6	1190	209.751		2104	CM523-7	2	1	6	57.45	18.13		2104
2105	Rainfed	CMR35-91-63	2	1	5	12200	3421.05		2105	CMR35-91-63	2	1	5	1950	246.403		2105	CMR35-91-63	2	1	5	35970	13518.8		2105	CMR35-91-63	2	1	5	3020	1293.37		2105	CMR35-91-63	2	1	5	690	151.036		2105	CMR35-91-63	2	1	5	195.92	65.84		2105
2106	Rainfed	KU50	2	1	2	8000	2344		2106	KU50	2	1	2	1460	433.749		2106	KU50	2	1	2	28340	11852.6		2106	KU50	2	1	2	1770	756.491		2106	KU50	2	1	2	490	99.5403		2106	KU50	2	1	2	31.33	9.8		2106
2201	Irrigation	RY72	2	2	4	9800	2795.54		2201	RY72	2	2	4	1050	552.857		2201	RY72	2	2	4	14600	4917.56		2201	RY72	2	2	4	2270	861.621		2201	RY72	2	2	4	330	60.2262		2201	RY72	2	2	4	6.12	2.07		2201
2202	Irrigation	RY9	2	2	1	8000	2199.56		2202	RY9	2	2	1	1320	578.337		2202	RY9	2	2	1	22950	8214.98		2202	RY9	2	2	1	3440	1274.07		2202	RY9	2	2	1	710	132.99		2202	RY9	2	2	1	40.31	10.68		2202
2203	Irrigation	CMR38-125-77	2	2	3	8200	2675.89		2203	CMR38-125-77	2	2	3	630	518.043		2203	CMR38-125-77	2	2	3	4690	1617.44		2203	CMR38-125-77	2	2	3	2620	887.619		2203	CMR38-125-77	2	2	3	190	38.2244		2203	CMR38-125-77	2	2	3	3.88	1.52		2203
2204	Irrigation	CMR35-91-63	2	2	5	10600	3280.4		2204	CMR35-91-63	2	2	5	1320	507.576		2204	CMR35-91-63	2	2	5	2230	673.693		2204	CMR35-91-63	2	2	5	3400	1216.82		2204	CMR35-91-63	2	2	5	480	91.905		2204	CMR35-91-63	2	2	5	89.24	27.27		2204
2205	Irrigation	KU50	2	2	2	14000	4623.77		2205	KU50	2	2	2	2410	470.173		2205	KU50	2	2	2	33450	13083.3		2205	KU50	2	2	2	2710	1101.2		2205	KU50	2	2	2	860	161.376		2205	KU50	2	2	2	41.32	13.97		2205
2206	Irrigation	CM523-7	2	2	6	15800	4597.8		2206	CM523-7	2	2	6	2410	348.405		2206	CM523-7	2	2	6	32790	9114.77		2206	CM523-7	2	2	6	2810	1034.69		2206	CM523-7	2	2	6	950	165.549		2206	CM523-7	2	2	6	37.45	11.61		2206
3101	Rainfed	CM523-7	3	1	6	23000	6856.09		3101	CM523-7	3	1	6	2800	568.691		3101	CM523-7	3	1	6	46370	14960.5		3101	CM523-7	3	1	6	2870	1128.81		3101	CM523-7	3	1	6	1080	203.272		3101	CM523-7	3	1	6	97.18	26.04		3101
3102	Rainfed	CMR35-91-63	3	1	5	15200	4685.67		3102	CMR35-91-63	3	1	5	2410	529.781		3102	CMR35-91-63	3	1	5	32000	11782.3		3102	CMR35-91-63	3	1	5	3490	1481.88		3102	CMR35-91-63	3	1	5	820	167.932		3102	CMR35-91-63	3	1	5	208.04	60.59		3102
3103	Rainfed	RY9	3	1	1	13200	2738.64		3103	RY9	3	1	1	3390	614.7		3103	RY9	3	1	1	37890	13429.8		3103	RY9	3	1	1	2880	970.18		3103	RY9	3	1	1	1930	325.286		3103	RY9	3	1	1	161.1	43.44		3103
3104	Rainfed	KU50	3	1	2	17800	5268.13		3104	KU50	3	1	2	3620	690.556		3104	KU50	3	1	2	49810	17685.7		3104	KU50	3	1	2	2930	1215.68		3104	KU50	3	1	2	1450	265.096		3104	KU50	3	1	2	51.44	14.31		3104
3105	Rainfed	CMR38-125-77	3	1	3	11600	3315.88		3105	CMR38-125-77	3	1	3	1690	384.497		3105	CMR38-125-77	3	1	3	23108	8940.73		3105	CMR38-125-77	3	1	3	2320	917.426		3105	CMR38-125-77	3	1	3	640	113.248		3105	CMR38-125-77	3	1	3	58.87	17.27		3105
3106	Rainfed	RY72	3	1	4	14400	3331.73		3106	RY72	3	1	4	3150	618.682		3106	RY72	3	1	4	42030	14525.3		3106	RY72	3	1	4	2110	817.721		3106	RY72	3	1	4	1240	224.26		3106	RY72	3	1	4	58.66	15.65		3106
3201	Irrigation	KU50	3	2	2	18800	6301.69		3201	KU50	3	2	2	3750	727.204		3201	KU50	3	2	2	35472.9	10571.9		3201	KU50	3	2	2	2730	1178.83		3201	KU50	3	2	2	1310	260.043		3201	KU50	3	2	2	26.91	7.98		3201
3202	Irrigation	RY9	3	2	1	13600	3567.65		3202	RY9	3	2	1	2370	464.647		3202	RY9	3	2	1	32220	10501.7		3202	RY9	3	2	1	3610	1307.88		3202	RY9	3	2	1	1500	277.272		3202	RY9	3	2	1	90.33	22.2		3202
3203	Irrigation	CM523-7	3	2	6	26000	6902.26		3203	CM523-7	3	2	6	1940	379.578		3203	CM523-7	3	2	6	3720	865.137		3203	CM523-7	3	2	6	4080	1552.4		3203	CM523-7	3	2	6	1070	158.125		3203	CM523-7	3	2	6				3203
3204	Irrigation	RY72	3	2	5	6200	1643.42		3204	RY72	3	2	5	570	129.991		3204	RY72	3	2	5	all rotten			3204	RY72	3	2	5	2070	710.619		3204	RY72	3	2	5	170	32.0399		3204	RY72	3	2	5				3204
3205	Irrigation	CMR38-125-77	3	2	3	14000	4872.75		3205	CMR38-125-77	3	2	3	710	178.451		3205	CMR38-125-77	3	2	3	18880	6553.32		3205	CMR38-125-77	3	2	3	3360	1336.03		3205	CMR38-125-77	3	2	3	160	34.9612		3205	CMR38-125-77	3	2	3	24.62	7.09		3205
3206	Irrigation	CMR35-91-63	3	2	4	14200	4345.2		3206	CMR35-91-63	3	2	4	2510	805.628		3206	CMR35-91-63	3	2	4	23310	70122.5		3206	CMR35-91-63	3	2	4	3090	1200.33		3206	CMR35-91-63	3	2	4	900	177.506		3206	CMR35-91-63	3	2	4	193	51.49		3206
4101	Rainfed	CMR38-125-77	4	1	3	14000	4509.58		4101	CMR38-125-77	4	1	3	1420	334.147		4101	CMR38-125-77	4	1	3	19510	7373.77		4101	CMR38-125-77	4	1	3	2960	1021.36		4101	CMR38-125-77	4	1	3	450	88.932		4101	CMR38-125-77	4	1	3	32.65	9.51		4101
4102	Rainfed	RY9	4	1	1	15500	4164.96		4102	RY9	4	1	1	2380	507.948		4102	RY9	4	1	1	16190	5678.27		4102	RY9	4	1	1	4160	1308.17		4102	RY9	4	1	1	1290	239.916		4102	RY9	4	1	1	36.45	9.12		4102
4103	Rainfed	CMR35-91-63	4	1	5	18500	5866.9		4103	CMR35-91-63	4	1	5	2350	518.092		4103	CMR35-91-63	4	1	5	13880	4515.74		4103	CMR35-91-63	4	1	5	4390	1752.37		4103	CMR35-91-63	4	1	5	850	160.752		4103	CMR35-91-63	4	1	5	131.17	33.76		4103
4104	Rainfed	RY72	4	1	4	9500	2283.41		4104	RY72	4	1	4	1260	304.792		4104	RY72	4	1	4	7200	1839.61		4104	RY72	4	1	4	2490	841.244		4104	RY72	4	1	4	450	71.0718		4104	RY72	4	1	4	46.85	11.66		4104
4105	Rainfed	CM523-7	4	1	6	13500	3421.47		4105	CM523-7	4	1	6	1400	307.119		4105	CM523-7	4	1	6	3090	754.274		4105	CM523-7	4	1	6	2560	796.849		4105	CM523-7	4	1	6	660	104.017		4105	CM523-7	4	1	6	62.1	15.19		4105
4106	Rainfed	KU50	4	1	2	6000	1904.04		4106	KU50	4	1	2	920	214.772		4106	KU50	4	1	2	830	279.982		4106	KU50	4	1	2	1930	717.399		4106	KU50	4	1	2	340	61.7505		4106	KU50	4	1	2	32.04	9.6		4106
4201	Irrigation	RY72	4	2	4	7300	1549.7		4201	RY72	4	2	4	1230	306.219		4201	RY72	4	2	4	1440	431.809		4201	RY72	4	2	4	1890	679.964		4201	RY72	4	2	4	420	70.6726		4201	RY72	4	2	4	37.2	9.37		4201
4202	Irrigation	CMR35-91-63	4	2	5	10050	2955.47		4202	CMR35-91-63	4	2	5	560	145.66		4202	CMR35-91-63	4	2	5	960	272.955		4202	CMR35-91-63	4	2	5	3010	979.947		4202	CMR35-91-63	4	2	5	170	31.7766		4202	CMR35-91-63	4	2	5	136.27	36.24		4202
4203	Irrigation	KU50	4	2	2	16000	4848.87		4203	KU50	4	2	2	1890	411.039		4203	KU50	4	2	2	8110	2520.49		4203	KU50	4	2	2	3080	1182.49		4203	KU50	4	2	2	650	121.605		4203	KU50	4	2	2	10.49	2.57		4203
4204	Irrigation	RY9	4	2	1	11100	2894.68		4204	RY9	4	2	1	1050	229.444		4204	RY9	4	2	1	1860	620.597		4204	RY9	4	2	1	3110	1135.7		4204	RY9	4	2	1	450	74.8177		4204	RY9	4	2	1	88.32	24		4204
4205	Irrigation	CM523-7	4	2	6	11800	2478.67		4205	CM523-7	4	2	6	1570	344.956		4205	CM523-7	4	2	6	3210	738.606		4205	CM523-7	4	2	6	3630	1005.32		4205	CM523-7	4	2	6	720	118.669		4205	CM523-7	4	2	6	194.52	47.39		4205
4206	Irrigation	CMR38-125-77	4	2	3	7000	1924.63		4206	CMR38-125-77	4	2	3	370	503.273		4206	CMR38-125-77	4	2	3	all rotten			4206	CMR38-125-77	4	2	3	2120	681.702		4206	CMR38-125-77	4	2	3	90	14.3885		4206	CMR38-125-77	4	2	3				4206
[truncated: 7 more columns]

## Sheet: 3 MAP_Year 2
Stem weight									Leaf weight								Tuber weight
Plot No	Water	Var	Rep	Main P	Sub P	Fresh weight	Dry weight		Plot No	Var	Rep	Main P	Sub P	Fresh weight	Dry weight		Plot No	Var	Rep	Main P	Sub P	Fresh weight	Dry weight
1101	Rainfed	RY9	1	1	1	165.899	67.4705		1101	RY9	1	1	1	62.94	18.38		1101	RY9	1	1	1	250	69.9697
1102	Rainfed	KU50	1	1	2	453.02	64.2703		1102	KU50	1	1	2	146.45	42.48		1102	KU50	1	1	2	340	95.1588
1103	Rainfed	CMR38-125-77	1	1	3	216.53	67.19		1103	CMR38-125-77	1	1	3	249.45	68.85		1103	CMR38-125-77	1	1	3	550	178.19
1104	Rainfed	CMR35-91-63	1	1	5	854.915	191.52		1104	CMR35-91-63	1	1	5	201.25	56.29		1104	CMR35-91-63	1	1	5	430	142.37
1105	Rainfed	RY72	1	1	4	133.63	46.363		1105	RY72	1	1	4	72.38	21.81		1105	RY72	1	1	4	840	170.076
1106	Rainfed	CM523-7	1	1	6	137.012	79.8574		1106	CM523-7	1	1	6	85.65	23.4		1106	CM523-7	1	1	6	250	72.5912
1201	Irrigation	KU50	1	2	2	187.553	52.4328		1201	KU50	1	2	2	102.66	30.48		1201	KU50	1	2	2	180	40.19
1202	Irrigation	CMR38-125-77	1	2	3	262.347	98.7927		1202	CMR38-125-77	1	2	3	129.16	36.53		1202	CMR38-125-77	1	2	3	570	160.608
1203	Irrigation	CMR35-91-63	1	2	5	506.715	80.9423		1203	CMR35-91-63	1	2	5	88.03	24.82		1203	CMR35-91-63	1	2	5	2130	719.502
1204	Irrigation	RY9	1	2	1	147.23	45.8175		1204	RY9	1	2	1	100.04	29.16		1204	RY9	1	2	1	1830	526.511
1205	Irrigation	RY72	1	2	4	126.451	96.8255		1205	RY72	1	2	4	70.34	21.95		1205	RY72	1	2	4	570	160.502
1206	Irrigation	CM523-7	1	2	6	202.18	4.59423		1206	CM523-7	1	2	6	27.81	9.77		1206	CM523-7	1	2	6	270	61.2982
2101	Rainfed	RY9	2	1	1	118.247	30.849		2101	RY9	2	1	1	94.03	28.19		2101	RY9	2	1	1	340	95.1588
2102	Rainfed	RY72	2	1	4	99.2347	19.0392		2102	RY72	2	1	4	77.61	22.69		2102	RY72	2	1	4	240	38.9148
2103	Rainfed	CMR38-125-77	2	1	3	553.579	81.0049		2103	CMR38-125-77	2	1	3	96.56	27.5		2103	CMR38-125-77	2	1	3	440	133.913
2104	Rainfed	CM523-7	2	1	6	173.871	25.0649		2104	CM523-7	2	1	6	61.91	19.23		2104	CM523-7	2	1	6	680	209.471
2105	Rainfed	CMR35-91-63	2	1	5	251.702	36.1985		2105	CMR35-91-63	2	1	5	97.72	27.91		2105	CMR35-91-63	2	1	5	580	160.971
2106	Rainfed	KU50	2	1	2	64.072	24.3023		2106	KU50	2	1	2	100.19	30.67		2106	KU50	2	1	2	480	124.278
2201	Irrigation	RY72	2	2	4	78.7881	12.2662		2201	RY72	2	2	4	54.11	17.32		2201	RY72	2	2	4	420	115.805
2202	Irrigation	RY9	2	2	1	65.2893	42.5562		2202	RY9	2	2	1	83.94	24.53		2202	RY9	2	2	1	740	244.403
2203	Irrigation	CMR38-125-77	2	2	3	534.297	223.877		2203	CMR38-125-77	2	2	3	197.13	55.62		2203	CMR38-125-77	2	2	3	250	61.8646
2204	Irrigation	CMR35-91-63	2	2	5	199.54	44.96		2204	CMR35-91-63	2	2	5	221.76	62.51		2204	CMR35-91-63	2	2	5	860	187.615
2205	Irrigation	KU50	2	2	2	255.695	77.7839		2205	KU50	2	2	2	175.62	52.52		2205	KU50	2	2	2	620	158.394
2206	Irrigation	CM523-7	2	2	6	117.591	18.7816		2206	CM523-7	2	2	6	80.94	22.41		2206	CM523-7	2	2	6	120	34.39
3101	Rainfed	CM523-7	3	1	6	153.474	78.6535		3101	CM523-7	3	1	6	112.92	32.13		3101	CM523-7	3	1	6	330	93.6066
3102	Rainfed	CMR35-91-63	3	1	5	182.875	54.1788		3102	CMR35-91-63	3	1	5	131.13	36.9		3102	CMR35-91-63	3	1	5	380	101.692
3103	Rainfed	RY9	3	1	1	116.28	46.3073		3103	RY9	3	1	1	87.25	25.03		3103	RY9	3	1	1	760	221.663
3104	Rainfed	KU50	3	1	2	81.2244	43.8709		3104	KU50	3	1	2	95.42	28.85		3104	KU50	3	1	2	880	290.597
3105	Rainfed	CMR38-125-77	3	1	3	102.064	130.497		3105	CMR38-125-77	3	1	3	110.64	32.9		3105	CMR38-125-77	3	1	3	180	40.19
3106	Rainfed	RY72	3	1	4	178.95	21.3764		3106	RY72	3	1	4	73.74	21.93		3106	RY72	3	1	4	820	255.395
3201	Irrigation	KU50	3	2	2	155.61	39.2702		3201	KU50	3	2	2	75.06	23.52		3201	KU50	3	2	2	820	222.23
3202	Irrigation	RY9	3	2	1	174.69	82.7659		3202	RY9	3	2	1	67.79	19.4		3202	RY9	3	2	1	670	169.283
3203	Irrigation	CM523-7	3	2	6	153.57	43		3203	CM523-7	3	2	6	55.38	17.14		3203	CM523-7	3	2	6	570	160.608
3204	Irrigation	RY72	3	2	5	454.521	94.2176		3204	RY72	3	2	5	141.82	43.26		3204	RY72	3	2	5	1660	529.265
3205	Irrigation	CMR38-125-77	3	2	3	240.197	71.2826		3205	CMR38-125-77	3	2	3	129.82	38.04		3205	CMR38-125-77	3	2	3	790	224.807
3206	Irrigation	CMR35-91-63	3	2	4	154.644	124.542		3206	CMR35-91-63	3	2	4	126.72	35.97		3206	CMR35-91-63	3	2	4	580	165.89
4101	Rainfed	CMR38-125-77	4	1	3	270.832	104.78		4101	CMR38-125-77	4	1	3	148.32	41.8		4101	CMR38-125-77	4	1	3	690	169.586
4102	Rainfed	RY9	4	1	1	111.608	108.802		4102	RY9	4	1	1	113.67	33.43		4102	RY9	4	1	1	730	196.185
4103	Rainfed	CMR35-91-63	4	1	5	168.045	84.6299		4103	CMR35-91-63	4	1	5	107.84	31.16		4103	CMR35-91-63	4	1	5	510	138.47
4104	Rainfed	RY72	4	1	4	209.64	54.42		4104	RY72	4	1	4	155.12	47.63		4104	RY72	4	1	4	220	54.85
4105	Rainfed	CM523-7	4	1	6	56.6734	37.5862		4105	CM523-7	4	1	6	126.12	36.86		4105	CM523-7	4	1	6	1020	237.011
4106	Rainfed	KU50	4	1	2	149.91	84.26		4106	KU50	4	1	2	158.57	48.77		4106	KU50	4	1	2	580	148.215
4201	Irrigation	RY72	4	2	4	22.86	2.18		4201	RY72	4	2	4	61.55	18.83		4201	RY72	4	2	4	1260	389.371
4202	Irrigation	CMR35-91-63	4	2	5	117.806	12.9587		4202	CMR35-91-63	4	2	5	94.9	27.56		4202	CMR35-91-63	4	2	5	161	39.59
4203	Irrigation	KU50	4	2	2	30.4708	26.192		4203	KU50	4	2	2	57.25	18.24		4203	KU50	4	2	2	270	61.2982
4204	Irrigation	RY9	4	2	1	259.259	91.636		4204	RY9	4	2	1	126.61	37.45		4204	RY9	4	2	1	160	36.4373
4205	Irrigation	CM523-7	4	2	6	119.994	80.5212		4205	CM523-7	4	2	6	81.58	25.81		4205	CM523-7	4	2	6	230	50.3371
4206	Irrigation	CMR38-125-77	4	2	3	108.823	55.4011		4206	CMR38-125-77	4	2	3	126.05	36.09		4206	CMR38-125-77	4	2	3	450	97.42

[truncated: 3 more sheets: 5 MAP_Year 2, 6 MAP_Year 2, 12 MAP_Year 2]
